# Supplementary material for: Construction and Validation of a Macrophage-Associated Risk Model for Predicting the Prognosis of Osteosarcoma
Source: Hindawi journal article supplement (doi:10.1155/2021/9967954), 2021-06-02
Supplement: f1 [file 9967954.f1.zip]

**Table S1** *Full list of MAGs*

ABCC6  
ABHD16A  
ABI3  
ACOT12  
ADAM21  
ADORA2B  
AFG3L2  
AK3  
AK8  
AKAP10  
AKAP11  
AKNAD1  
ALOX5AP  
ANAPC10  
ANGPTL7  
ANXA2  
APOBEC2  
APOBEC3B  
APOBEC4  
ARHGEF37  
ARL5A  
ARPP21  
ASAH2  
ASB13  
ASPA  
ATP1B1  
ATP6V0D1  
ATP6V1E1  
AVP  
B9D2  
BAIAP3  
BAMBI  
BATF2  
BBS2  
BCAS4  
BEX4  
BEX5  
BFSP2-AS1  
BRWD1  
C10orf90  
C16orf54  
C1R  
C6  
CACNA1A  
CACUL1  
CADM2  
CAMKK1  
CAMP  
CAPN5  
CAPZB  
CBY1  
CCDC171  
CCDC51  
CCDC85B  
CCL20  
CCL5  
CCR1

CCT6B  
CD84  
CDK4  
CENPJ  
CENPO  
CEPT1  
CGREF1  
CHMP5  
CHN1  
CHRNA5  
CHST11  
CHST7  
CIB3  
CIC  
CLCF1  
CLDN11  
CLEC7A  
CLIP3  
CLSPN  
CMC2  
CNOT3  
COL12A1  
CRYZ  
CTSB  
CTSG  
CXCR5  
CXorf38  
CYLC2  
CYSLTR1  
DAO  
DDX6  
DENND4C  
DHRS1  
DHX9  
DIAPH3  
DICER1  
DIO2  
DMD  
DNAJA3  
DOCK3  
DPM3  
DPY19L4  
DSP  
DUSP23  
DYNC1H1  
DYRK2  
ECT2  
EGLN3  
EGR3  
EHHADH  
ELFN2  
ENC1  
EOMES  
EPCAM  
FAM110C  
FAM126A  
FAM160B2  
FAM171A1

FAM78A  
FAM98B  
FAS  
FAT1  
FBXO31  
FBXO46  
FCER2  
FCRL1  
FKBP9  
FNTB  
FOSL2  
FOXG1  
FOXRED2  
FSD1L  
FUBP1  
FZD7  
GAN  
GDF9  
GLCE  
GLIPR1L1  
GNB4  
GNPDA2  
GNRH1  
GOT1  
GPN2  
GPX1  
GRIA2  
GYG1  
HABP2  
HAT1  
HCP5  
HEATR6  
HEBP1  
HLA-DQA1  
HMGB3P1  
HMGN2P46  
HOOK2  
HP1BP3  
HPS3  
HSP90AB1  
HSPA12B  
ICOS  
IDH3G  
IFI27  
IFNA5  
IGFBP3  
IL16  
IL17A  
IL1R1  
IL6  
INTS9  
IPO5  
IQGAP2  
IRAK1  
IRS1  
ITCH  
ITGA4  
ITPKB

JUNB  
KCNJ16  
KCNJ9  
KLF10  
KLHL10  
KLHL9  
KRBA1  
KRTAP4-3  
LAYN  
LIMK1  
LMNB1  
LMNTD2  
LRR3B  
LRR56  
MACF1  
MAD1L1  
MAMDC4  
MAN1C1  
MAOA  
MAP1LC3A  
MAP3K5  
MAPRE2  
MECP2  
MED13L  
MEF2D  
METTL1  
METTL21A  
MGAT1  
MIOS  
MOB1A  
MOB2  
MSN  
MT2A  
MX1  
MYB  
MYH9  
MYL4  
MYOF  
NCAPG  
NCAPG2  
NCF4  
NDUFA3  
NDUFA4  
NDUFB4  
NDUFB6  
NELFCD  
NEUROG1  
NFE2  
NFKB1  
NFKBIE  
NIFK  
NIPBL  
NLGN3  
NOL12  
NOP16  
NPL  
NQO2  
NR4A1

NT5E  
NUBP2  
NUDT5  
OSGEP  
OSMR  
OTUB2  
OTUD7B  
P2RX4  
PACRG  
PAK1  
PATZ1  
PCDH12  
PCM1  
PCOLCE2  
PDCD4-AS1  
PDGFC  
PFDN1  
PGK1  
PHF8  
PHLPP1  
PIM1  
PITPNA  
PKDREJ  
PLA2G6  
PLAT  
PLEKHG3  
PLEKHO1  
PML  
PODXL  
POFUT2  
PRAM1  
PRCP  
PRDM9  
PRKCZ  
PRPF6  
PSMB1  
PSMB9  
PSTK  
PTPRCAP  
PUS10  
QPCT  
QSOX1  
RAB37  
RAD21  
RAN  
RAP1GDS1  
RENB  
RGS1  
RIOK3  
RNF113A  
RPLP1  
RRAGC  
RREB1  
RWDD2A  
S100PBP  
SBF1  
SCCPDH  
SCFD2

SDHAF2  
SEC61B  
SEMA4B  
SESTD1  
SH2D5  
SH3TC1  
SH3YL1  
SKA1  
SLC12A3  
SLC16A5  
SLC16A6  
SLC17A3  
SLC1A5  
SLC22A18AS  
SLC25A51  
SLITRK1  
SMAP1  
SMARCB1  
SMPDL3B  
SNRPF  
SNX21  
SNX9  
SPATA5L1  
SPC25  
SPG21  
SPNS2  
SPSB1  
SPTAN1  
SPTLC2  
SREBF1  
SRP72  
SSBP4  
SSH2  
STARD5  
SUPV3L1  
SURF1  
SV2A  
SYT1  
TAF4B  
TAF9  
TATDN2  
TBC1D22A  
TBC1D9B  
TDRD3  
TEX43  
TIMM8B  
TLN2  
TMED9  
TMEM181  
TMEM229B  
TMEM26  
TMEM33  
TMEM39B  
TMEM50B  
TMX3  
TMX4  
TNFRSF9  
TOB1

TOP2B  
TPCN1  
TPRA1  
TRIM26  
TRIM45  
TRIM59  
TRMT61B  
TRRAP  
TSG101  
TSHZ3  
TTF1  
TXNIP  
TXNL1  
TYRO3  
UBASH3B  
UBN1  
UBXN1  
UCHL3  
UIMC1  
VAC14  
VPS54  
VRK2  
VSTM2L  
WAS  
WDFY3  
WDFY4  
WDR1  
WDSUB1  
WIP1  
WNT9A  
YTHDC2  
ZC3H18  
ZC3HAV1  
ZDHHC20  
ZNF195  
ZNF214  
ZNF706
