# Supplementary material for: Construction and Validation of a Macrophage-Associated Risk Model for Predicting the Prognosis of Osteosarcoma
Source: Hindawi journal article supplement (doi:10.1155/2021/9967954), 2021-06-02
Supplement: f1 [file 9967954.f1.zip]

| NAME                                                         | SIZE | ES           | NES          | NOM<br>p-val | FDR<br>q-val |
|--------------------------------------------------------------|------|--------------|--------------|--------------|--------------|
| GO_LYMPHOCYTE_MIGRATION                                      | 100  | 0.66<br>2682 | 2.60<br>5554 | 0            | 0            |
| GO_POSITIVE_REGULATION_OF_LEUKOCYTE_CELL_CELL_ADHESION       | 213  | 0.59<br>4902 | 2.50<br>326  | 0            | 0            |
| GO_REGULATION_OF_T_CELL_ACTIVATION                           | 295  | 0.57<br>8123 | 2.49<br>9535 | 0            | 0            |
| GO_T_CELL_MIGRATION                                          | 60   | 0.68<br>761  | 2.49<br>3484 | 0            | 0            |
| GO_POSITIVE_REGULATION_OF_CELL_ACTIVATION                    | 306  | 0.57<br>4885 | 2.48<br>5302 | 0            | 0            |
| GO_T_CELL_SELECTION                                          | 46   | 0.71<br>8135 | 2.48<br>3788 | 0            | 0            |
| GO_POSITIVE_REGULATION_OF_CELL_CELL_ADHESION                 | 251  | 0.57<br>7862 | 2.47<br>1592 | 0            | 0            |
| GO_LEUKOCYTE_CELL_CELL_ADHESION                              | 315  | 0.56<br>7109 | 2.46<br>7614 | 0            | 0            |
| GO_REGULATION_OF_ANTIGEN_PROCESSING_AND_PRESENTATION         | 20   | 0.84<br>115  | 2.45<br>0723 | 0            | 0            |
| GO_POSITIVE_REGULATION_OF_LYMPHOCYTE_ACTIVATION              | 256  | 0.57<br>282  | 2.44<br>6987 | 0            | 0            |
| GO_T_CELL_PROLIFERATION                                      | 173  | 0.58<br>8115 | 2.43<br>6239 | 0            | 0            |
| GO GRANULOCYTE_MIGRATION                                     | 131  | 0.60<br>1154 | 2.42<br>8709 | 0            | 0            |
| GO_LEUKOCYTE_CHEMOTAXIS                                      | 192  | 0.57<br>1646 | 2.42<br>5486 | 0            | 0            |
| GO_LYMPHOCYTE_CHEMOTAXIS                                     | 55   | 0.68<br>3626 | 2.42<br>2843 | 0            | 0            |
| GO_NEUTROPHIL_MIGRATION                                      | 109  | 0.60<br>9793 | 2.41<br>9596 | 0            | 0            |
| GO_POSITIVE_REGULATION_OF_T_CELL_PROLIFERATION               | 91   | 0.62<br>4127 | 2.41<br>0845 | 0            | 0            |
| GO_PHAGOCYTOSIS                                              | 245  | 0.56<br>2916 | 2.40<br>9646 | 0            | 0            |
| GO_NEUTROPHIL_CHEMOTAXIS                                     | 91   | 0.62<br>8903 | 2.39<br>2467 | 0            | 0            |
| GO GRANULOCYTE_CHEMOTAXIS                                    | 109  | 0.60<br>9363 | 2.39<br>2123 | 0            | 0            |
| GO_REGULATION_OF_ANTIGEN_RECEPTOR_MEDIATED_SIGNALING_PATHWAY | 58   | 0.66<br>0735 | 2.39<br>1574 | 0            | 0            |
| GO_REGULATION_OF_LYMPHOCYTE_ACTIVATION                       | 389  | 0.54<br>0677 | 2.38<br>4926 | 0            | 0            |

|                                                                       |     |              |              |   |   |
|-----------------------------------------------------------------------|-----|--------------|--------------|---|---|
| GO_NEGATIVE_REGULATION_OF_ANTIGEN_RECEPTOR_MEDIATED_SIGNALING_PATHWAY | 29  | 0.75<br>7873 | 2.38<br>3657 | 0 | 0 |
| GO_NEGATIVE_REGULATION_OF_T_CELL_PROLIFERATION                        | 54  | 0.66<br>1625 | 2.37<br>9403 | 0 | 0 |
| GO_T_CELL_ACTIVATION                                                  | 428 | 0.53<br>7028 | 2.37<br>4717 | 0 | 0 |
| GO_ADAPTIVE_IMMUNE_RESPONSE                                           | 373 | 0.53<br>8104 | 2.35<br>8241 | 0 | 0 |
| GO_T_CELL_ACTIVATION_INVOLVED_IN_IMMUNE_RESPONSE                      | 96  | 0.60<br>517  | 2.35<br>7699 | 0 | 0 |
| GO_POSITIVE_REGULATION_OF_LYMPHOCYTE_MIGRATION                        | 37  | 0.70<br>7383 | 2.34<br>5374 | 0 | 0 |
| GO_POSITIVE_T_CELL_SELECTION                                          | 33  | 0.72<br>2144 | 2.34<br>4931 | 0 | 0 |
| GO_REGULATION_OF_T_CELL_MIGRATION                                     | 41  | 0.68<br>6666 | 2.34<br>2113 | 0 | 0 |
| GO_DENDRITIC_CELL_DIFFERENTIATION                                     | 39  | 0.69<br>3192 | 2.34<br>0819 | 0 | 0 |
| GO_MYELOID_LEUKOCYTE_MIGRATION                                        | 189 | 0.55<br>3928 | 2.32<br>8297 | 0 | 0 |
| GO_REGULATION_OF_CELL_ACTIVATION                                      | 499 | 0.52<br>5062 | 2.32<br>645  | 0 | 0 |
| GO_REGULATION_OF_CELL_CELL_ADHESION                                   | 379 | 0.52<br>8376 | 2.32<br>3718 | 0 | 0 |
| GO_RESPONSE_TO_INTERFERON_GAMMA                                       | 184 | 0.55<br>9983 | 2.31<br>7679 | 0 | 0 |
| GO_POSITIVE_REGULATION_OF_T_CELL_MIGRATION                            | 30  | 0.72<br>9278 | 2.31<br>4566 | 0 | 0 |
| GO_POSITIVE_REGULATION_OF_LEUKOCYTE_DIFFERENTIATION                   | 142 | 0.56<br>886  | 2.31<br>436  | 0 | 0 |
| GO_INTERLEUKIN_10_PRODUCTION                                          | 50  | 0.65<br>9351 | 2.30<br>5205 | 0 | 0 |
| GO_NEGATIVE_REGULATION_OF_LYMPHOCYTE_ACTIVATION                       | 131 | 0.56<br>7592 | 2.30<br>2895 | 0 | 0 |
| GO_REGULATION_OF_LEUKOCYTE_PROLIFERATION                              | 214 | 0.54<br>1933 | 2.30<br>2565 | 0 | 0 |
| GO_NEGATIVE_REGULATION_OF_LEUKOCYTE_CELL_CELL_ADHESION                | 107 | 0.58<br>1071 | 2.30<br>1881 | 0 | 0 |
| GO_TUMOR_NECROSIS_FACTOR_BIOSYNTHETIC_PROCESS                         | 34  | 0.70<br>1455 | 2.28<br>8693 | 0 | 0 |
| GO_POSITIVE_REGULATION_OF_LYMPHOCYTE_DIFFERENTIATION                  | 95  | 0.59<br>2176 | 2.28<br>812  | 0 | 0 |
| GO_REGULATION_OF_LYMPHOCYTE_MIGRATION                                 | 56  | 0.63<br>2686 | 2.28<br>5851 | 0 | 0 |

|                                                      |     |              |              |   |              |
|------------------------------------------------------|-----|--------------|--------------|---|--------------|
| GO_LYMPHOCYTE_ACTIVATION_INVOLVED_IN_IMMUNE_RESPONSE | 162 | 0.55<br>1658 | 2.28<br>3278 | 0 | 0            |
| GO_B_CELL_RECEPTOR_SIGNALING_PATHWAY                 | 55  | 0.63<br>1155 | 2.28<br>0671 | 0 | 0            |
| GO_POSITIVE_REGULATION_OF_LEUKOCYTE_MIGRATION        | 125 | 0.56<br>0603 | 2.27<br>1138 | 0 | 0            |
| GO_REGULATION_OF_LEUKOCYTE_CHEMOTAXIS                | 102 | 0.57<br>7891 | 2.26<br>6589 | 0 | 0            |
| GO_NEGATIVE_REGULATION_OF_LEUKOCYTE_PROLIFERATION    | 76  | 0.60<br>0802 | 2.26<br>6166 | 0 | 0            |
| GO_CYTOKINE_METABOLIC_PROCESS                        | 65  | 0.61<br>5987 | 2.26<br>5264 | 0 | 0            |
| GO_POSITIVE_REGULATION_OF_LEUKOCYTE_CHEMOTAXIS       | 81  | 0.59<br>9358 | 2.26<br>2508 | 0 | 0            |
| GO_REGULATORY_T_CELL_DIFFERENTIATION                 | 30  | 0.72<br>0113 | 2.26<br>2024 | 0 | 0            |
| GO_LEUKOCYTE_MIGRATION                               | 403 | 0.51<br>3643 | 2.25<br>9166 | 0 | 0            |
| GO_MYELOID_LEUKOCYTE_MEDIATED_IMMUNITY               | 487 | 0.50<br>8336 | 2.25<br>0419 | 0 | 0            |
| GO_RESPIRATORY_BURST                                 | 29  | 0.71<br>5101 | 2.24<br>9501 | 0 | 0            |
| GO_LYMPHOCYTE_DIFFERENTIATION                        | 331 | 0.51<br>2976 | 2.24<br>7431 | 0 | 1.84<br>E-05 |
| GO_INFLAMMATORY_RESPONSE_TO_ANTIGENIC_STIMULUS       | 48  | 0.64<br>5039 | 2.24<br>6182 | 0 | 1.80<br>E-05 |
| GO_INTERFERON_GAMMA_PRODUCTION                       | 103 | 0.56<br>9137 | 2.24<br>3495 | 0 | 1.77<br>E-05 |
| GO_LEUKOCYTE_PROLIFERATION                           | 278 | 0.51<br>81   | 2.23<br>8519 | 0 | 1.74<br>E-05 |
| GO_REGULATION_OF_DEFENSE_RESPONSE_TO_VIRUS_BY_VIRUS  | 29  | 0.70<br>7042 | 2.23<br>1097 | 0 | 1.71<br>E-05 |
| GO_LYMPHOCYTE_MEDIATED_IMMUNITY                      | 233 | 0.52<br>3689 | 2.23<br>0246 | 0 | 1.68<br>E-05 |
| GO_EOSINOPHIL_MIGRATION                              | 22  | 0.74<br>9464 | 2.22<br>7357 | 0 | 1.66<br>E-05 |
| GO_POSITIVE_REGULATION_OF_LEUKOCYTE_PROLIFERATION    | 135 | 0.54<br>6517 | 2.22<br>6928 | 0 | 1.63<br>E-05 |
| GO_MONOCYTE_CHEMOTAXIS                               | 55  | 0.62<br>0264 | 2.22<br>4015 | 0 | 1.60<br>E-05 |
| GO_LYMPHOCYTE_COSTIMULATION                          | 57  | 0.61<br>9028 | 2.22<br>2101 | 0 | 1.58<br>E-05 |
| GO_POSITIVE_REGULATION_OF_CELL_ADHESION              | 385 | 0.50<br>26   | 2.21<br>9594 | 0 | 3.08<br>E-05 |

|                                                                      |     |      |      |   |      |
|----------------------------------------------------------------------|-----|------|------|---|------|
| GO_REGULATION_OF_T_CELL_RECEPTOR_SIGNALING_PATHWAY                   | 39  | 0.66 | 2.21 | 0 | 3.04 |
|                                                                      |     | 239  | 625  |   | E-05 |
| GO_REGULATION_OF_LEUKOCYTE_DIFFERENTIATION                           | 255 | 0.51 | 2.21 | 0 | 2.99 |
|                                                                      |     | 8404 | 581  |   | E-05 |
| GO_CELL_CHEMOTAXIS                                                   | 255 | 0.51 | 2.21 | 0 | 2.95 |
|                                                                      |     | 1257 | 2938 |   | E-05 |
| GO_REGULATION_OF_LYMPHOCYTE_DIFFERENTIATION                          | 161 | 0.53 | 2.21 | 0 | 2.90 |
|                                                                      |     | 8073 | 0085 |   | E-05 |
| GO_REGULATION_OF_LEUKOCYTE_MIGRATION                                 | 182 | 0.52 | 2.20 | 0 | 2.86 |
|                                                                      |     | 652  | 9654 |   | E-05 |
| GO_NEGATIVE_REGULATION_OF_CELL_ACTIVATION                            | 176 | 0.53 | 2.20 | 0 | 2.82 |
|                                                                      |     | 1529 | 7925 |   | E-05 |
| GO_REGULATION_OF_NEUTROPHIL_MIGRATION                                | 36  | 0.66 | 2.20 | 0 | 4.17 |
|                                                                      |     | 1333 | 6015 |   | E-05 |
| GO_REGULATION_OF_T_CELL_DIFFERENTIATION                              | 132 | 0.54 | 2.20 | 0 | 4.11 |
|                                                                      |     | 546  | 5676 |   | E-05 |
| GO_POSITIVE_REGULATION_OF_PHAGOCYTOSIS                               | 62  | 0.60 | 2.20 | 0 | 4.05 |
|                                                                      |     | 7817 | 5594 |   | E-05 |
| GO_INTERLEUKIN_6_PRODUCTION                                          | 124 | 0.55 | 2.20 | 0 | 4.00 |
|                                                                      |     | 1472 | 3345 |   | E-05 |
| GO_NEGATIVE_REGULATION_OF_T_CELL_RECEPTOR_SIGNALING_PATHWAY          | 22  | 0.75 | 2.20 | 0 | 3.95 |
|                                                                      |     | 819  | 2546 |   | E-05 |
| GO_THYMIC_T_CELL_SELECTION                                           | 22  | 0.73 | 2.19 | 0 | 3.90 |
|                                                                      |     | 4441 | 8023 |   | E-05 |
| GO_POSITIVE_REGULATION_OF_TUMOR_NECROSIS_FACTOR_BIOSYNTHETIC_PROCESS | 24  | 0.72 | 2.19 | 0 | 3.85 |
|                                                                      |     | 4791 | 4378 |   | E-05 |
| GO_MEMBRANE_INVAGINATION                                             | 61  | 0.61 | 2.19 | 0 | 3.80 |
|                                                                      |     | 1614 | 3723 |   | E-05 |
| GO_ALPHA_BETA_T_CELL_ACTIVATION                                      | 129 | 0.53 | 2.18 | 0 | 3.75 |
|                                                                      |     | 8771 | 8612 |   | E-05 |
| GO_REGULATION_OF_PHAGOCYTOSIS                                        | 85  | 0.57 | 2.18 | 0 | 3.70 |
|                                                                      |     | 288  | 8126 |   | E-05 |
| GO_T_CELL_DIFFERENTIATION                                            | 227 | 0.51 | 2.18 | 0 | 3.66 |
|                                                                      |     | 2756 | 5765 |   | E-05 |
| GO_LEUKOCYTE_DIFFERENTIATION                                         | 483 | 0.49 | 2.18 | 0 | 4.85 |
|                                                                      |     | 0662 | 3393 |   | E-05 |
| GO_B_CELL_MEDIATED_IMMUNITY                                          | 110 | 0.54 | 2.18 | 0 | 4.80 |
|                                                                      |     | 6517 | 2367 |   | E-05 |
| GO_REGULATION_OF_ALPHA_BETA_T_CELL_ACTIVATION                        | 84  | 0.57 | 2.18 | 0 | 4.74 |
|                                                                      |     | 2117 | 2312 |   | E-05 |
| GO_REGULATION_OF_LEUKOCYTE_APOPTOTIC_PROCESS                         | 76  | 0.58 | 2.17 | 0 | 4.68 |
|                                                                      |     | 2758 | 8112 |   | E-05 |
| GO_T_CELL_DIFFERENTIATION_INVOLVED_IN_IMMUNE_RESPONSE                | 64  | 0.59 | 2.17 | 0 | 4.63 |
|                                                                      |     | 1003 | 776  |   | E-05 |

|                                                                                                                              |     |              |              |   |              |
|------------------------------------------------------------------------------------------------------------------------------|-----|--------------|--------------|---|--------------|
| GO_MACROPHAGE_ACTIVATION                                                                                                     | 87  | 0.56<br>4028 | 2.17<br>5658 | 0 | 4.58<br>E-05 |
| GO_POSITIVE_REGULATION_OF_HEMOPOIESIS                                                                                        | 174 | 0.51<br>8853 | 2.17<br>1401 | 0 | 4.53<br>E-05 |
| GO_POSITIVE_REGULATION_OF_CYTOKINE_BIOSYNTHETIC_PROCESS                                                                      | 36  | 0.65<br>1235 | 2.17<br>0418 | 0 | 4.48<br>E-05 |
| GO_T_CELL_LINEAGE_COMMITMENT                                                                                                 | 26  | 0.69<br>9669 | 2.16<br>6321 | 0 | 5.54<br>E-05 |
| GO_ADAPTIVE_IMMUNE_RESPONSE_BASED_ON_SOMATIC_RECOMBINATION_OF_IMMUNE_RECEPTORS_BUILT_FROM_IMMUNOGLOBULIN_SUPERFAMILY_DOMAINS | 241 | 0.50<br>6708 | 2.16<br>525  | 0 | 5.48<br>E-05 |
| GO_ANTIGEN_RECEPTOR_MEDIATED_SIGNALING_PATHWAY                                                                               | 223 | 0.50<br>7932 | 2.16<br>5066 | 0 | 5.42<br>E-05 |
| GO_POSITIVE_REGULATION_OF_INTERFERON_GAMMA_PRODUCTION                                                                        | 61  | 0.59<br>4526 | 2.16<br>4817 | 0 | 5.36<br>E-05 |
| GO_SUPEROXIDE_ANION_GENERATION                                                                                               | 34  | 0.66<br>37   | 2.16<br>4041 | 0 | 5.31<br>E-05 |
| GO_MONONUCLEAR_CELL_MIGRATION                                                                                                | 79  | 0.57<br>0289 | 2.15<br>217  | 0 | 5.25<br>E-05 |
| GO_ACTIVATION_OF_IMMUNE_RESPONSE                                                                                             | 400 | 0.48<br>5214 | 2.14<br>9173 | 0 | 5.20<br>E-05 |
| GO_LEUKOCYTE_MIGRATION_INVOLVED_IN_INFLAMMATORY_RESPONSE                                                                     | 15  | 0.78<br>2733 | 2.14<br>8112 | 0 | 5.14<br>E-05 |
| GO_IMMUNE_RESPONSE_REGULATING_SIGNALING_PATHWAY                                                                              | 356 | 0.48<br>916  | 2.14<br>5424 | 0 | 6.11<br>E-05 |
| GO_LEUKOCYTE_APOPTOTIC_PROCESS                                                                                               | 97  | 0.55<br>4626 | 2.14<br>5368 | 0 | 6.05<br>E-05 |
| GO_CD4_POSITIVE_ALPHA_BETA_T_CELL_DIFFERENTIATION                                                                            | 70  | 0.57<br>5858 | 2.14<br>3602 | 0 | 5.99<br>E-05 |
| GO_MYELOID_DENDRITIC_CELL_ACTIVATION                                                                                         | 26  | 0.69<br>9618 | 2.14<br>1265 | 0 | 5.93<br>E-05 |
| GO_REGULATION_OF_LYMPHOCYTE_APOPTOTIC_PROCESS                                                                                | 51  | 0.60<br>9797 | 2.13<br>8035 | 0 | 6.86<br>E-05 |
| GO_NEGATIVE_REGULATION_OF_TUMOR_NECROSIS_FACTOR_SUPERFAMILY_CYTOKINE_PRODUCTION                                              | 56  | 0.59<br>7583 | 2.13<br>5595 | 0 | 7.76<br>E-05 |
| GO_ALPHA_BETA_T_CELL_DIFFERENTIATION                                                                                         | 95  | 0.55<br>0483 | 2.13<br>2121 | 0 | 7.69<br>E-05 |
| GO_RESPONSE_TO_CHEMOKINE                                                                                                     | 84  | 0.55<br>57   | 2.13<br>1028 | 0 | 8.57<br>E-05 |
| GO_INTERFERON_GAMMA_MEDIATED_SIGNALING_PATHWAY                                                                               | 84  | 0.55<br>9119 | 2.13<br>0851 | 0 | 8.48<br>E-05 |
| GO_TUMOR_NECROSIS_FACTOR_SUPERFAMILY_CYTOKINE_PRODUCTION                                                                     | 149 | 0.51<br>8556 | 2.12<br>7194 | 0 | 8.41<br>E-05 |
| GO_POSITIVE_REGULATION_OF_INTERLEUKIN_10_PRODUCTION                                                                          | 32  | 0.65<br>7525 | 2.11<br>9292 | 0 | 9.27<br>E-05 |

|                                                                                              |     |              |              |   |              |
|----------------------------------------------------------------------------------------------|-----|--------------|--------------|---|--------------|
| GO_ALPHA_BETA_T_CELL_ACTIVATION_INVOLVED_IN_IMMUNE_RESPONSE                                  | 57  | 0.58<br>6809 | 2.11<br>8717 | 0 | 9.19<br>E-05 |
| GO_APOPTOTIC_CELL_CLEARANCE                                                                  | 44  | 0.62<br>3039 | 2.11<br>4624 | 0 | 9.10<br>E-05 |
| GO_ANTIGEN_PROCESSING_AND_PRESENTATION_OF_PEPTIDE_OR_POLYSACCHARIDE_ANTIGEN_VIA_MHC_CLASS_II | 92  | 0.54<br>9479 | 2.11<br>1593 | 0 | 1.08<br>E-04 |
| GO_REGULATION_OF GRANULOCYTE_CHEMOTAXIS                                                      | 41  | 0.62<br>5649 | 2.10<br>0096 | 0 | 1.52<br>E-04 |
| GO_REGULATION_OF_LEUKOCYTE_MEDIATED_IMMUNITY                                                 | 186 | 0.50<br>1449 | 2.09<br>4599 | 0 | 1.94<br>E-04 |
| GO_NATURAL_KILLER_CELL_DIFFERENTIATION                                                       | 21  | 0.71<br>9445 | 2.09<br>3546 | 0 | 1.93<br>E-04 |
| GO_CELLULAR_EXTRAVASATION                                                                    | 64  | 0.56<br>7777 | 2.09<br>2932 | 0 | 2.00<br>E-04 |
| GO_POSITIVE_REGULATION_OF_INTERLEUKIN_6_PRODUCTION                                           | 76  | 0.55<br>1867 | 2.09<br>1817 | 0 | 2.07<br>E-04 |
| GO_INTEGRIN_MEDIATED_SIGNALING_PATHWAY                                                       | 98  | 0.53<br>0638 | 2.09<br>176  | 0 | 2.05<br>E-04 |
| GO_LEUKOCYTE_MEDIATED_CYTOTOXICITY                                                           | 96  | 0.53<br>5166 | 2.08<br>7774 | 0 | 2.12<br>E-04 |
| GO_REGULATION_OF_LYMPHOCYTE_CHEMOTAXIS                                                       | 25  | 0.68<br>3938 | 2.08<br>4562 | 0 | 2.18<br>E-04 |
| GO_NEGATIVE_REGULATION_OF_IMMUNE_SYSTEM_PROCESS                                              | 382 | 0.47<br>3154 | 2.08<br>1801 | 0 | 2.25<br>E-04 |
| GO_CYTOKINE_SECRETION                                                                        | 103 | 0.53<br>6491 | 2.07<br>97   | 0 | 2.31<br>E-04 |
| GO_REGULATION_OF_B_CELL_ACTIVATION                                                           | 109 | 0.52<br>1724 | 2.07<br>8072 | 0 | 2.29<br>E-04 |
| GO_ALPHA_BETA_T_CELL_PROLIFERATION                                                           | 31  | 0.65<br>4139 | 2.07<br>5075 | 0 | 2.36<br>E-04 |
| GO_REGULATION_OF_NEUTROPHIL_CHEMOTAXIS                                                       | 27  | 0.66<br>8834 | 2.07<br>3943 | 0 | 2.42<br>E-04 |
| GO_NEGATIVE_REGULATION_OF_CELL_CELL_ADHESION                                                 | 155 | 0.49<br>7316 | 2.07<br>0665 | 0 | 2.56<br>E-04 |
| GO_RESPONSE_TO_MOLECULE_OF_BACTERIAL_ORIGIN                                                  | 295 | 0.47<br>815  | 2.06<br>6321 | 0 | 2.78<br>E-04 |
| GO_NEGATIVE_REGULATION_OF_LEUKOCYTE_APOPTOTIC_PROCESS                                        | 43  | 0.60<br>7736 | 2.06<br>6242 | 0 | 2.76<br>E-04 |
| GO_REGULATION_OF_MONOCYTE_DIFFERENTIATION                                                    | 18  | 0.72<br>4955 | 2.06<br>5359 | 0 | 2.73<br>E-04 |
| GO_INTERLEUKIN_8_PRODUCTION                                                                  | 72  | 0.55<br>3318 | 2.06<br>4677 | 0 | 2.71<br>E-04 |
| GO_B_CELL_ACTIVATION                                                                         | 227 | 0.48<br>8913 | 2.06<br>3804 | 0 | 2.77<br>E-04 |

|                                                                                 |     |              |              |              |              |
|---------------------------------------------------------------------------------|-----|--------------|--------------|--------------|--------------|
| GO_NEUROINFLAMMATORY_RESPONSE                                                   | 62  | 0.56<br>7238 | 2.06<br>1835 | 0            | 2.90<br>E-04 |
| GO_FC_RECEPTOR_MEDIATED_STIMULATORY_SIGNALING_PATHWAY                           | 80  | 0.54<br>5332 | 2.06<br>1776 | 0            | 2.88<br>E-04 |
| GO_REGULATION_OF_MYELOID_LEUKOCYTE_MEDIATED_IMMUNITY                            | 53  | 0.58<br>0476 | 2.05<br>5048 | 0            | 3.08<br>E-04 |
| GO_LYMPHOCYTE_APOPTOTIC_PROCESS                                                 | 68  | 0.55<br>7205 | 2.05<br>4822 | 0            | 3.06<br>E-04 |
| GO_LEUKOCYTE_ACTIVATION_INVOLVED_IN_INFLAMMATORY_RESPONSE                       | 42  | 0.60<br>3973 | 2.05<br>1811 | 0            | 3.41<br>E-04 |
| GO_POSITIVE_REGULATION_OF_ALPHA_BETA_T_CELL_ACTIVATION                          | 56  | 0.56<br>731  | 2.04<br>9973 | 0            | 3.60<br>E-04 |
| GO_POSITIVE_REGULATION_OF_INTERLEUKIN_8_PRODUCTION                              | 49  | 0.58<br>3878 | 2.04<br>5623 | 0            | 3.72<br>E-04 |
| GO_INTERLEUKIN_12_PRODUCTION                                                    | 51  | 0.57<br>6115 | 2.04<br>2001 | 0            | 4.20<br>E-04 |
| GO_INTERLEUKIN_1_BETA_PRODUCTION                                                | 78  | 0.54<br>0712 | 2.03<br>4562 | 0            | 4.75<br>E-04 |
| GO_INTERLEUKIN_2_PRODUCTION                                                     | 48  | 0.58<br>1805 | 2.03<br>3078 | 0            | 4.71<br>E-04 |
| GO_REGULATION_OF_LEUKOCYTE_DEGRANULATION                                        | 44  | 0.59<br>4485 | 2.03<br>2272 | 0.00<br>1279 | 4.82<br>E-04 |
| GO_CD4_POSITIVE_OR_CD8_POSITIVE_ALPHA_BETA_T_CELL_LINEAGE_COMMITMENT            | 20  | 0.70<br>9071 | 2.03<br>2206 | 0            | 4.79<br>E-04 |
| GO_TYPE_2_IMMUNE_RESPONSE                                                       | 36  | 0.61<br>3294 | 2.03<br>1384 | 0            | 4.76<br>E-04 |
| GO_POSITIVE_REGULATION_OF_TUMOR_NECROSIS_FACTOR_SUPERFAMILY_CYTOKINE_PRODUCTION | 85  | 0.53<br>4326 | 2.03<br>0892 | 0            | 4.72<br>E-04 |
| GO_CD8_POSITIVE_ALPHA_BETA_T_CELL_ACTIVATION                                    | 25  | 0.66<br>3707 | 2.02<br>7085 | 0            | 5.04<br>E-04 |
| GO_POSITIVE_REGULATION_OF_LYMPHOCYTE_CHEMOTAXIS                                 | 21  | 0.69<br>4718 | 2.02<br>5358 | 0            | 5.27<br>E-04 |
| GO_EOSINOPHIL_CHEMOTAXIS                                                        | 18  | 0.72<br>1812 | 2.02<br>4064 | 0            | 5.37<br>E-04 |
| GO_POSITIVE_REGULATION_OF_MACROPHAGE_MIGRATION                                  | 21  | 0.69<br>4793 | 2.02<br>3289 | 0            | 5.47<br>E-04 |
| GO_POSITIVE_REGULATION_OF_INTERLEUKIN_4_PRODUCTION                              | 23  | 0.69<br>1672 | 2.02<br>0692 | 0            | 5.64<br>E-04 |
| GO_T_CELL_CHEMOTAXIS                                                            | 25  | 0.66<br>7661 | 2.01<br>7918 | 0            | 5.73<br>E-04 |
| GO_LEUKOCYTE_HOMEOSTASIS                                                        | 78  | 0.53<br>6225 | 2.01<br>5926 | 0            | 5.76<br>E-04 |
| GO_CELLULAR_RESPONSE_TO_MOLECULE_OF_BACTERIAL_ORIGIN                            | 179 | 0.48<br>2988 | 2.01<br>4738 | 0            | 5.72<br>E-04 |

|                                                                                  |     |              |              |   |              |
|----------------------------------------------------------------------------------|-----|--------------|--------------|---|--------------|
| GO_DETECTION_OF_OTHER_ORGANISM                                                   | 18  | 0.72<br>3448 | 2.01<br>4725 | 0 | 5.69<br>E-04 |
| GO_POSITIVE_REGULATION_OF_INTERLEUKIN_1_PRODUCTION                               | 51  | 0.57<br>339  | 2.01<br>3799 | 0 | 5.84<br>E-04 |
| GO_DETECTION_OF_BIOTIC_STIMULUS                                                  | 34  | 0.61<br>1689 | 2.01<br>2907 | 0 | 5.87<br>E-04 |
| GO_CD4_POSITIVE_ALPHA_BETA_T_CELL_ACTIVATION                                     | 84  | 0.52<br>4208 | 2.00<br>9333 | 0 | 6.22<br>E-04 |
| GO_DETECTION_OF_EXTERNAL_BIOTIC_STIMULUS                                         | 23  | 0.68<br>6455 | 2.00<br>8252 | 0 | 6.24<br>E-04 |
| GO_MYELOID_LEUKOCYTE_DIFFERENTIATION                                             | 191 | 0.47<br>5993 | 2.00<br>8134 | 0 | 6.21<br>E-04 |
| GO_B_CELL_DIFFERENTIATION                                                        | 125 | 0.50<br>2273 | 2.00<br>7046 | 0 | 6.36<br>E-04 |
| GO_POSITIVE_REGULATION_OF_CYTOKINE_PRODUCTION                                    | 403 | 0.45<br>5171 | 2.00<br>6411 | 0 | 6.38<br>E-04 |
| GO_GLIAL_CELL_ACTIVATION                                                         | 50  | 0.57<br>7683 | 2.00<br>5353 | 0 | 6.40<br>E-04 |
| GO_ACTIVATED_T_CELL_PROLIFERATION                                                | 42  | 0.60<br>1511 | 2.00<br>4459 | 0 | 6.36<br>E-04 |
| GO_NEGATIVE_REGULATION_OF_INTERFERON_GAMMA_PRODUCTION                            | 30  | 0.63<br>5515 | 2.00<br>3824 | 0 | 6.45<br>E-04 |
| GO_CHEMOKINE_PRODUCTION                                                          | 81  | 0.52<br>1655 | 2.00<br>3218 | 0 | 6.47<br>E-04 |
| GO_REGULATION_OF_TYPE_2_IMMUNE_RESPONSE                                          | 28  | 0.63<br>691  | 2.00<br>1842 | 0 | 6.55<br>E-04 |
| GO_T_CELL_RECEPTOR_SIGNALING_PATHWAY                                             | 183 | 0.48<br>1442 | 2.00<br>1219 | 0 | 6.57<br>E-04 |
| GO_REGULATION_OF_CELL_KILLING                                                    | 84  | 0.52<br>295  | 2.00<br>0648 | 0 | 6.71<br>E-04 |
| GO_NEGATIVE_REGULATION_OF_ALPHA_BETA_T_CELL_ACTIVATION                           | 32  | 0.62<br>0432 | 1.99<br>8819 | 0 | 7.21<br>E-04 |
| GO_INTERLEUKIN_1_PRODUCTION                                                      | 89  | 0.52<br>375  | 1.99<br>4079 | 0 | 8.05<br>E-04 |
| GO_NEGATIVE_REGULATION_OF_INTERLEUKIN_6_PRODUCTION                               | 36  | 0.60<br>8016 | 1.99<br>2638 | 0 | 8.36<br>E-04 |
| GO_HETEROTYPIC_CELL_CELL_ADHESION                                                | 60  | 0.55<br>0619 | 1.99<br>257  | 0 | 8.37<br>E-04 |
| GO_POSITIVE_REGULATION_OF_ALPHA_BETA_T_CELL_PROLIFERATION                        | 20  | 0.69<br>3478 | 1.99<br>0034 | 0 | 8.61<br>E-04 |
| GO_NATURAL_KILLER_CELL_ACTIVATION                                                | 69  | 0.53<br>2914 | 1.98<br>6396 | 0 | 9.61<br>E-04 |
| GO_IMMUNOGLOBULIN_PRODUCTION_INVOLVED_IN_IMMUNOGLOBULIN_MEDIATED_IMMUNE_RESPONSE | 51  | 0.56<br>6207 | 1.98<br>4737 | 0 | 0.00<br>1001 |



|                                                             |     |      |      |   |      |
|-------------------------------------------------------------|-----|------|------|---|------|
| GO_ANTIGEN_PROCESSING_AND_PRESENTATION                      | 213 | 0.47 | 1.98 | 0 | 0.00 |
|                                                             |     | 2178 | 1726 |   | 1036 |
| GO_ACUTE_INFLAMMATORY_RESPONSE_TO_ANTIGENIC_STIMULUS        | 21  | 0.68 | 1.98 | 0 | 0.00 |
|                                                             |     | 6965 | 1096 |   | 1047 |
| GO_REGULATION_OF_ALPHA_BETA_T_CELL_DIFFERENTIATION          | 57  | 0.55 | 1.97 | 0 | 0.00 |
|                                                             |     | 5585 | 8011 |   | 1086 |
| GO_CELLULAR_DEFENSE_RESPONSE                                | 50  | 0.56 | 1.97 | 0 | 0.00 |
|                                                             |     | 1508 | 7182 |   | 1097 |
| GO_POSITIVE_REGULATION_OF_INFLAMMATORY_RESPONSE             | 134 | 0.48 | 1.97 | 0 | 0.00 |
|                                                             |     | 8395 | 5596 |   | 1125 |
| GO_LYSOSOME_LOCALIZATION                                    | 65  | 0.53 | 1.97 | 0 | 0.00 |
|                                                             |     | 5488 | 5575 |   | 1118 |
| GO_POSITIVE_REGULATION_OF_IMMUNE_EFFECTOR_PROCESS           | 192 | 0.46 | 1.96 | 0 | 0.00 |
|                                                             |     | 795  | 8357 |   | 1245 |
| GO_POSITIVE_REGULATION_OF_ALPHA_BETA_T_CELL_DIFFERENTIATION | 41  | 0.57 | 1.96 | 0 | 0.00 |
|                                                             |     | 8897 | 722  |   | 1266 |
| GO_MAST_CELL_MEDIATED_IMMUNITY                              | 46  | 0.56 | 1.96 | 0 | 0.00 |
|                                                             |     | 6286 | 6315 |   | 1291 |
| GO_INTERLEUKIN_13_PRODUCTION                                | 20  | 0.68 | 1.96 | 0 | 0.00 |
|                                                             |     | 1554 | 4891 |   | 1317 |
| GO_REGULATION_OF_INFLAMMATORY_RESPONSE                      | 324 | 0.44 | 1.96 | 0 | 0.00 |
|                                                             |     | 9449 | 1084 |   | 1402 |
| GO_REGULATION_OF_HEMOPOIESIS                                | 403 | 0.44 | 1.95 | 0 | 0.00 |
|                                                             |     | 5387 | 9958 |   | 141  |
| GO_REGULATION_OF_LYMPHOCYTE_MEDIATED_IMMUNITY               | 136 | 0.48 | 1.95 | 0 | 0.00 |
|                                                             |     | 609  | 942  |   | 1403 |
| GO_REGULATION_OF_SUPEROXIDE_ANION_GENERATION                | 21  | 0.66 | 1.95 | 0 | 0.00 |
|                                                             |     | 3634 | 4501 |   | 1507 |
| GO_REGULATION_OF_B_CELL_MEDIATED_IMMUNITY                   | 46  | 0.57 | 1.95 | 0 | 0.00 |
|                                                             |     | 0415 | 3829 |   | 1526 |
| GO_NEGATIVE_REGULATION_OF_PEPTIDYL_TYROSINE_PHOSPHORYLATION | 45  | 0.57 | 1.95 | 0 | 0.00 |
|                                                             |     | 4058 | 3325 |   | 1523 |
| GO_B_CELL_ACTIVATION_INVOLVED_IN_IMMUNE_RESPONSE            | 69  | 0.52 | 1.95 | 0 | 0.00 |
|                                                             |     | 6694 | 0828 |   | 1589 |
| GO_REGULATION_OF_MYELOID_LEUKOCYTE_DIFFERENTIATION          | 109 | 0.49 | 1.94 | 0 | 0.00 |
|                                                             |     | 5192 | 9691 |   | 1596 |
| GO_NEGATIVE_REGULATION_OF_IMMUNE_RESPONSE                   | 142 | 0.47 | 1.94 | 0 | 0.00 |
|                                                             |     | 9957 | 7314 |   | 1629 |
| GO_DENDRITIC_CELL_MIGRATION                                 | 23  | 0.65 | 1.94 | 0 | 0.00 |
|                                                             |     | 8673 | 7142 |   | 1621 |
| GO_REGULATION_OF_IMMUNE_EFFECTOR_PROCESS                    | 357 | 0.43 | 1.94 | 0 | 0.00 |
|                                                             |     | 9426 | 6235 |   | 1633 |
| GO_CELL_JUNCTION_DISASSEMBLY                                | 19  | 0.68 | 1.94 | 0 | 0.00 |
|                                                             |     | 7291 | 3913 |   | 1671 |

|                                                            |     |              |              |              |              |
|------------------------------------------------------------|-----|--------------|--------------|--------------|--------------|
| GO_NEGATIVE_REGULATION_OF_CYTOKINE_PRODUCTION              | 232 | 0.45<br>643  | 1.94<br>3649 | 0            | 0.00<br>1667 |
| GO_ANTIGEN_PROCESSING_AND_PRESENTATION_OF_PEPTIDE_ANTIGEN  | 175 | 0.46<br>3767 | 1.94<br>2159 | 0            | 0.00<br>1699 |
| GO_REGULATION_OF_CD8_POSITIVE_ALPHA_BETA_T_CELL_ACTIVATION | 17  | 0.69<br>5697 | 1.94<br>0646 | 0            | 0.00<br>1736 |
| GO_POSITIVE_REGULATION_OF_B_CELL_MEDIATED_IMMUNITY         | 31  | 0.60<br>5321 | 1.94<br>0349 | 0            | 0.00<br>1733 |
| GO_NEGATIVE_REGULATION_OF_INTERLEUKIN_10_PRODUCTION        | 16  | 0.71<br>4511 | 1.94<br>0082 | 0.00<br>1473 | 0.00<br>1739 |
| GO_REGULATION_OF_LEUKOCYTE_MEDIATED_CYTOTOXICITY           | 69  | 0.52<br>0618 | 1.93<br>9245 | 0            | 0.00<br>1745 |
| GO_CELLULAR_RESPONSE_TO_BIOTIC_STIMULUS                    | 200 | 0.45<br>6671 | 1.93<br>6701 | 0            | 0.00<br>1771 |
| GO_NATURAL_KILLER_CELL_MEDIATED_IMMUNITY                   | 57  | 0.53<br>9032 | 1.93<br>6369 | 0            | 0.00<br>1777 |
| GO_PINOCYTOSIS                                             | 20  | 0.66<br>2529 | 1.93<br>4713 | 0            | 0.00<br>1822 |
| GO_NEGATIVE_REGULATION_OF_REGULATED_SECRETORY_PATHWAY      | 22  | 0.65<br>5457 | 1.93<br>3004 | 0            | 0.00<br>1872 |
| GO_REGULATION_OF_MACROPHAGE_MIGRATION                      | 35  | 0.58<br>9817 | 1.93<br>2434 | 0            | 0.00<br>1873 |
| GO_T_CELL_MEDIATED_IMMUNITY                                | 98  | 0.50<br>0803 | 1.93<br>0382 | 0            | 0.00<br>1975 |
| GO_POSITIVE_REGULATION_OF_LYMPHOCYTE_APOPTOTIC_PROCESS     | 15  | 0.72<br>016  | 1.92<br>9704 | 0            | 0.00<br>1984 |
| GO_POSITIVE_REGULATION_OF_TYPE_2_IMMUNE_RESPONSE           | 15  | 0.71<br>6932 | 1.92<br>7717 | 0            | 0.00<br>2008 |
| GO_IMMUNOGLOBULIN_SECRETION                                | 19  | 0.67<br>3252 | 1.92<br>7637 | 0.00<br>1439 | 0.00<br>1999 |
| GO_NEGATIVE_REGULATION_OF_CELL_ADHESION                    | 245 | 0.45<br>2838 | 1.92<br>4303 | 0            | 0.00<br>2117 |
| GO_POSITIVE_REGULATION_OF_CALCIIUM_MEDIATED_SIGNALING      | 39  | 0.57<br>7685 | 1.92<br>4199 | 0            | 0.00<br>2107 |
| GO_NEGATIVE_REGULATION_OF_EXOCYTOSIS                       | 30  | 0.61<br>1381 | 1.92<br>1329 | 0            | 0.00<br>2215 |
| GO_CYTOKINE_PRODUCTION_INVOLVED_IN_INFLAMMATORY_RESPONSE   | 45  | 0.55<br>6727 | 1.92<br>0053 | 0            | 0.00<br>2265 |
| GO_T_CELL_HOMEOSTASIS                                      | 36  | 0.58<br>9736 | 1.91<br>9012 | 0            | 0.00<br>2287 |
| GO_CELL_KILLING                                            | 148 | 0.46<br>6573 | 1.91<br>5337 | 0            | 0.00<br>2407 |
| GO_REGULATION_OF_ADAPTIVE_IMMUNE_RESPONSE                  | 151 | 0.46<br>6833 | 1.91<br>44   | 0            | 0.00<br>2437 |

|                                                                   |     |              |              |              |              |
|-------------------------------------------------------------------|-----|--------------|--------------|--------------|--------------|
| GO_MYELOID_CELL_DIFFERENTIATION                                   | 341 | 0.43<br>7918 | 1.91<br>3119 | 0            | 0.00<br>2462 |
| GO_ACTIN_POLYMERIZATION_OR_DEPOLYMERIZATION                       | 179 | 0.45<br>8553 | 1.91<br>2687 | 0            | 0.00<br>2465 |
| GO_T_HELPER_1_TYPE_IMMUNE_RESPONSE                                | 41  | 0.57<br>4467 | 1.91<br>1594 | 0            | 0.00<br>249  |
| GO_T_CELL_DIFFERENTIATION_IN_THYMUS                               | 71  | 0.51<br>3023 | 1.90<br>9394 | 0            | 0.00<br>2587 |
| GO_CHRONIC_INFLAMMATORY_RESPONSE                                  | 19  | 0.65<br>4454 | 1.90<br>6452 | 0.00<br>2865 | 0.00<br>2729 |
| GO_REGULATION_OF_B_CELL_DIFFERENTIATION                           | 27  | 0.61<br>065  | 1.90<br>4767 | 0            | 0.00<br>2765 |
| GO_REGULATION_OF_B_CELL_RECEPTOR_SIGNALING_PATHWAY                | 22  | 0.65<br>2165 | 1.90<br>3639 | 0            | 0.00<br>2807 |
| GO_MACROPHAGE_MIGRATION                                           | 47  | 0.54<br>0541 | 1.89<br>9017 | 0.00<br>1294 | 0.00<br>2958 |
| GO_ORGANELLE_MEMBRANE_FUSION                                      | 87  | 0.49<br>6832 | 1.89<br>7605 | 0            | 0.00<br>3016 |
| GO_POSITIVE_REGULATION_OF GRANULOCYTE_CHEMOTAXIS                  | 25  | 0.61<br>4542 | 1.89<br>1776 | 0            | 0.00<br>3324 |
| GO_MEMBRANE_RAFT_ORGANIZATION                                     | 22  | 0.64<br>073  | 1.88<br>9324 | 0            | 0.00<br>3437 |
| GO_POSITIVE_REGULATION_OF_RESPONSE_TO_CYTOKINE_STIMULUS           | 47  | 0.54<br>388  | 1.88<br>932  | 0            | 0.00<br>3422 |
| GO_REGULATION_OF_T_CELL_CYTOKINE_PRODUCTION                       | 31  | 0.58<br>2745 | 1.88<br>4203 | 0            | 0.00<br>3706 |
| GO_REGULATION_OF_HUMORAL_IMMUNE_RESPONSE                          | 66  | 0.51<br>4667 | 1.88<br>2603 | 0            | 0.00<br>3742 |
| GO_HUMORAL_IMMUNE_RESPONSE_MEDIATED_BY_CIRCULATING_IMMUNOGLOBULIN | 46  | 0.53<br>8832 | 1.88<br>2405 | 0            | 0.00<br>3731 |
| GO_POSITIVE_REGULATION_OF_ADAPTIVE_IMMUNE_RESPONSE                | 96  | 0.48<br>6505 | 1.87<br>9925 | 0            | 0.00<br>3877 |
| GO_POSITIVE_REGULATION_OF_LEUKOCYTE_MEDIATED_IMMUNITY             | 118 | 0.46<br>5705 | 1.87<br>9427 | 0            | 0.00<br>3878 |
| GO_POSITIVE_REGULATION_OF_NEUTROPHIL_MIGRATION                    | 27  | 0.62<br>1079 | 1.87<br>7181 | 0            | 0.00<br>4002 |
| GO_POSITIVE_REGULATION_OF_CYTOKINE_SECRETION                      | 57  | 0.52<br>8549 | 1.87<br>6747 | 0            | 0.00<br>4002 |
| GO_MACROPHAGE_DIFFERENTIATION                                     | 43  | 0.55<br>7597 | 1.87<br>5058 | 0.00<br>1277 | 0.00<br>4082 |
| GO_POSITIVE_REGULATION_OF_CHEMOTAXIS                              | 125 | 0.46<br>5204 | 1.87<br>3544 | 0            | 0.00<br>4162 |
| GO_REGULATION_OF_CD4_POSITIVE_ALPHA_BETA_T_CELL_DIFFERENTIATION   | 43  | 0.54<br>2307 | 1.87<br>1898 | 0            | 0.00<br>4261 |

|                                                                           |     |              |              |              |              |
|---------------------------------------------------------------------------|-----|--------------|--------------|--------------|--------------|
| GO_LYMPHOID_PROGENITOR_CELL_DIFFERENTIATION                               | 20  | 0.64<br>7802 | 1.87<br>0933 | 0            | 0.00<br>4298 |
| GO_POSITIVE_REGULATION_OF_MYELOID_LEUKOCYTE_DIFFERENTIATION               | 52  | 0.53<br>1853 | 1.86<br>9906 | 0            | 0.00<br>4347 |
| GO_REGULATION_OF_ISOTYPE_SWITCHING                                        | 29  | 0.58<br>7965 | 1.86<br>9548 | 0            | 0.00<br>4353 |
| GO_CELL_SUBSTRATE_ADHESION                                                | 318 | 0.43<br>0243 | 1.86<br>6694 | 0            | 0.00<br>4561 |
| GO_VASCULAR_ENDOTHELIAL_GROWTH_FACTOR_RECEPTOR_SIGNALING_PATHWAY          | 85  | 0.48<br>9572 | 1.86<br>5159 | 0            | 0.00<br>4641 |
| GO_TOLERANCE_INDUCION                                                     | 21  | 0.64<br>5559 | 1.86<br>4771 | 0            | 0.00<br>4647 |
| GO_REGULATION_OF_MAST_CELL_ACTIVATION_INVOLVED_IN_IMMUNE_RESPONSE         | 31  | 0.58<br>2984 | 1.86<br>1766 | 0            | 0.00<br>4831 |
| GO_ASTROCYTE_DEVELOPMENT                                                  | 40  | 0.55<br>1011 | 1.86<br>117  | 0.00<br>1348 | 0.00<br>4884 |
| GO_POSITIVE_REGULATION_OF_CD4_POSITIVE_ALPHA_BETA_T_CELL_DIFFERENTIATION  | 26  | 0.61<br>4167 | 1.85<br>9909 | 0.00<br>1418 | 0.00<br>4953 |
| GO_REGULATION_OF_CD4_POSITIVE_ALPHA_BETA_T_CELL_ACTIVATION                | 53  | 0.52<br>4617 | 1.85<br>9638 | 0            | 0.00<br>4946 |
| GO_POSITIVE_REGULATION_OF_ANTIGEN_RECEPTOR_MEDIATED_SIGNALING_PATHWAY     | 18  | 0.66<br>5807 | 1.85<br>9279 | 0            | 0.00<br>4934 |
| GO_NEGATIVE_REGULATION_OF_CYTOKINE_PRODUCTION_INVOLVED_IN_IMMUNE_RESPONSE | 24  | 0.62<br>0003 | 1.85<br>9048 | 0            | 0.00<br>4934 |
| GO_B_CELL_PROLIFERATION                                                   | 86  | 0.48<br>9763 | 1.85<br>7516 | 0            | 0.00<br>5026 |
| GO_REGULATION_OF_CYTOKINE_PRODUCTION_INVOLVED_IN_IMMUNE_RESPONSE          | 76  | 0.49<br>3886 | 1.85<br>7345 | 0            | 0.00<br>5018 |
| GO_REGULATION_OF_CALCIIUM_MEDIATED_SIGNALING                              | 84  | 0.48<br>7257 | 1.85<br>5789 | 0            | 0.00<br>5124 |
| GO_POSITIVE_REGULATION_OF_CD4_POSITIVE_ALPHA_BETA_T_CELL_ACTIVATION       | 32  | 0.57<br>7463 | 1.85<br>5202 | 0            | 0.00<br>5139 |
| GO_MYELOID_DENDRITIC_CELL_DIFFERENTIATION                                 | 16  | 0.67<br>2624 | 1.85<br>1922 | 0.00<br>1443 | 0.00<br>54   |
| GO_BASEMENT_MEMBRANE_ORGANIZATION                                         | 28  | 0.59<br>4438 | 1.85<br>059  | 0            | 0.00<br>5508 |
| GO_MONONUCLEAR_CELL_DIFFERENTIATION                                       | 33  | 0.57<br>0431 | 1.85<br>008  | 0            | 0.00<br>5522 |
| GO_T_HELPER_CELL_LINEAGE_COMMITMENT                                       | 15  | 0.69<br>0078 | 1.84<br>9726 | 0            | 0.00<br>5543 |
| GO_REGULATION_OF_CELL_SHAPE                                               | 134 | 0.45<br>1516 | 1.84<br>7096 | 0            | 0.00<br>5752 |
| GO_REGULATION_OF_INFLAMMATORY_RESPONSE_TO_ANTIGENIC_STIMULUS              | 26  | 0.60<br>0347 | 1.84<br>7015 | 0.00<br>141  | 0.00<br>573  |

|                                                        |     |              |              |              |              |
|--------------------------------------------------------|-----|--------------|--------------|--------------|--------------|
| GO_LEUKOCYTE_ADHESION_TO_VASCULAR_ENDOTHELIAL_CELL     | 41  | 0.53<br>9541 | 1.84<br>6481 | 0.00<br>1312 | 0.00<br>5739 |
| GO_ORGANELLE_FUSION                                    | 111 | 0.46<br>7681 | 1.84<br>571  | 0            | 0.00<br>5744 |
| GO_REGULATION_OF_B_CELL_APOPTOTIC_PROCESS              | 19  | 0.63<br>9711 | 1.84<br>4798 | 0.00<br>1437 | 0.00<br>5787 |
| GO_NEGATIVE_REGULATION_OF_LEUKOCYTE_MEDIATED_IMMUNITY  | 51  | 0.52<br>6968 | 1.84<br>3141 | 0            | 0.00<br>5867 |
| GO_MAST_CELL_ACTIVATION                                | 57  | 0.51<br>78   | 1.84<br>3022 | 0            | 0.00<br>5852 |
| GO_B_CELL_APOPTOTIC_PROCESS                            | 25  | 0.60<br>227  | 1.84<br>167  | 0            | 0.00<br>5943 |
| GO_NEGATIVE_REGULATION_OF_LEUKOCYTE_DIFFERENTIATION    | 91  | 0.47<br>8315 | 1.84<br>0791 | 0            | 0.00<br>5988 |
| GO_POSITIVE_REGULATION_OF_ERK1_AND_ERK2_CASCADE        | 175 | 0.44<br>5226 | 1.83<br>9779 | 0            | 0.00<br>6063 |
| GO_ACUTE_INFLAMMATORY_RESPONSE                         | 101 | 0.46<br>8837 | 1.83<br>9559 | 0            | 0.00<br>6059 |
| GO_POSITIVE_REGULATION_OF_LYMPHOCYTE_MEDIATED_IMMUNITY | 92  | 0.47<br>2742 | 1.83<br>4572 | 0            | 0.00<br>6432 |
| GO_INTERLEUKIN_4_PRODUCTION                            | 32  | 0.57<br>8623 | 1.83<br>4107 | 0            | 0.00<br>6449 |
| GO_LYTIC_VACUOLE_ORGANIZATION                          | 55  | 0.51<br>1185 | 1.83<br>3734 | 0            | 0.00<br>6447 |
| GO_MEMBRANE_FUSION                                     | 133 | 0.45<br>4533 | 1.83<br>1246 | 0            | 0.00<br>6708 |
| GO_REGULATION_OF_CELL_SUBSTRATE_ADHESION               | 190 | 0.43<br>3435 | 1.82<br>8466 | 0            | 0.00<br>6953 |
| GO_COMPLEMENT_ACTIVATION                               | 64  | 0.49<br>4506 | 1.82<br>8443 | 0            | 0.00<br>6928 |
| GO_REGULATION_OF_CHEMOTAXIS                            | 190 | 0.43<br>6561 | 1.82<br>6906 | 0            | 0.00<br>7026 |
| GO_ENDOSOME_TO_LYSOSOME_TRANSPORT                      | 41  | 0.54<br>0898 | 1.82<br>4952 | 0            | 0.00<br>7209 |
| GO_POSITIVE_REGULATION_OF_B_CELL_ACTIVATION            | 69  | 0.49<br>6027 | 1.82<br>492  | 0            | 0.00<br>7187 |
| GO_POSITIVE_REGULATION_OF_ACUTE_INFLAMMATORY_RESPONSE  | 27  | 0.58<br>5107 | 1.82<br>4214 | 0.00<br>1401 | 0.00<br>7226 |
| GO_T_CELL_APOPTOTIC_PROCESS                            | 45  | 0.53<br>0189 | 1.82<br>3296 | 0            | 0.00<br>7282 |
| GO_NEGATIVE_REGULATION_OF_T_CELL_DIFFERENTIATION       | 37  | 0.55<br>3988 | 1.82<br>1816 | 0            | 0.00<br>7399 |
| GO_LYMPHOCYTE_HOMEOSTASIS                              | 58  | 0.51<br>1743 | 1.82<br>0961 | 0            | 0.00<br>7443 |

|                                                      |     |              |              |              |              |
|------------------------------------------------------|-----|--------------|--------------|--------------|--------------|
| GO_REGULATION_OF_CELL_MATRIX_ADHESION                | 109 | 0.45<br>7671 | 1.81<br>5534 | 0            | 0.00<br>8015 |
| GO_REGULATION_OF_ACTIN_FILAMENT_LENGTH               | 153 | 0.43<br>8857 | 1.81<br>469  | 0            | 0.00<br>8061 |
| GO_ERK1_AND_ERK2_CASCADE                             | 268 | 0.42<br>0259 | 1.81<br>3919 | 0            | 0.00<br>8124 |
| GO_CYTOKINE_PRODUCTION_INVOLVED_IN_IMMUNE_RESPONSE   | 95  | 0.46<br>1756 | 1.81<br>3413 | 0            | 0.00<br>8148 |
| GO_REGULATION_OF_ACTIN_CYTOSKELETON_REORGANIZATION   | 37  | 0.55<br>2148 | 1.81<br>2873 | 0.00<br>1406 | 0.00<br>8189 |
| GO_REGULATION_OF_MONONUCLEAR_CELL_MIGRATION          | 41  | 0.52<br>7225 | 1.81<br>2859 | 0            | 0.00<br>8161 |
| GO_PHAGOSOME_MATURATION                              | 45  | 0.53<br>0268 | 1.81<br>2549 | 0            | 0.00<br>8157 |
| GO_DENDRITIC_CELL_CHEMOTAXIS                         | 18  | 0.63<br>5237 | 1.81<br>0563 | 0            | 0.00<br>8329 |
| GO_ENTRY_INTO_HOST                                   | 130 | 0.44<br>8075 | 1.80<br>9737 | 0            | 0.00<br>8389 |
| GO_NEGATIVE_REGULATION_OF_LYMPHOCYTE_DIFFERENTIATION | 46  | 0.51<br>4913 | 1.80<br>9514 | 0.00<br>2571 | 0.00<br>8391 |
| GO_REGULATION_OF_NATURAL_KILLER_CELL_ACTIVATION      | 30  | 0.57<br>4097 | 1.80<br>7814 | 0.00<br>1399 | 0.00<br>8543 |
| GO_NEGATIVE_REGULATION_OF_INFLAMMATORY_RESPONSE      | 129 | 0.45<br>0687 | 1.80<br>6655 | 0            | 0.00<br>868  |
| GO_MOVEMENT_IN_HOST_ENVIRONMENT                      | 150 | 0.44<br>5306 | 1.80<br>6012 | 0            | 0.00<br>8742 |
| GO_REGULATION_OF_B_CELL_PROLIFERATION                | 59  | 0.49<br>7391 | 1.80<br>3401 | 0.00<br>1255 | 0.00<br>8982 |
| GO_LIPOPOLYSACCHARIDE_MEDIATED_SIGNALING_PATHWAY     | 55  | 0.51<br>0753 | 1.80<br>2831 | 0            | 0.00<br>9026 |
| GO_REGULATION_OF_ACUTE_INFLAMMATORY_RESPONSE         | 44  | 0.53<br>6408 | 1.80<br>1701 | 0.00<br>1287 | 0.00<br>9143 |
| GO_POSITIVE_REGULATION_OF_CELL_KILLING               | 56  | 0.49<br>8745 | 1.79<br>8948 | 0            | 0.00<br>9506 |
| GO_REGULATION_OF_MACROPHAGE_CHEMOTAXIS               | 23  | 0.59<br>2918 | 1.79<br>8615 | 0.00<br>1435 | 0.00<br>9528 |
| GO_COAGULATION                                       | 303 | 0.41<br>4037 | 1.79<br>7461 | 0            | 0.00<br>9612 |
| GO_NEGATIVE_REGULATION_OF_MACROPHAGE_ACTIVATION      | 16  | 0.66<br>046  | 1.79<br>5803 | 0.00<br>4471 | 0.00<br>9805 |
| GO_REGULATION_OF_MACROPHAGE_ACTIVATION               | 50  | 0.51<br>1502 | 1.79<br>4466 | 0.00<br>1305 | 0.00<br>9914 |
| GO_REGULATION_OF_MAST_CELL_ACTIVATION                | 40  | 0.52<br>6021 | 1.79<br>3153 | 0.00<br>1318 | 0.01<br>0053 |

|                                                                        |     |              |              |              |              |
|------------------------------------------------------------------------|-----|--------------|--------------|--------------|--------------|
| GO_PRODUCTION_OF_MOLECULAR_MEDIATOR_INVOLVED_IN_INFLAMMATORY_RESPONSE  | 67  | 0.48<br>4208 | 1.79<br>2621 | 0            | 0.01<br>0092 |
| GO_POSITIVE_REGULATION_OF_MYELOID_CELL_DIFFERENTIATION                 | 84  | 0.47<br>4947 | 1.79<br>1868 | 0            | 0.01<br>017  |
| GO_REGULATION_OF_SYSTEMIC_ARTERIAL_BLOOD_PRESSURE_BY_RENIN_ANGIOTENSIN | 25  | 0.58<br>7102 | 1.79<br>1753 | 0.00<br>5764 | 0.01<br>0147 |
| GO_MATURE_B_CELL_DIFFERENTIATION                                       | 26  | 0.58<br>1088 | 1.78<br>8912 | 0.00<br>1433 | 0.01<br>0461 |
| GO_REGULATION_OF_MEMBRANE_PROTEIN_ECTODOMAIN_PROTEOLYSIS               | 21  | 0.61<br>5849 | 1.78<br>8479 | 0.00<br>419  | 0.01<br>0502 |
| GO_NEGATIVE_REGULATION_OF_IMMUNE_EFFECTOR_PROCESS                      | 114 | 0.45<br>5754 | 1.78<br>7255 | 0            | 0.01<br>0629 |
| GO_REGULATION_OF_PROTEIN_LOCALIZATION_TO_PLASMA_MEMBRANE               | 89  | 0.46<br>006  | 1.78<br>5521 | 0            | 0.01<br>0854 |
| GO_RESPONSE_TO_TUMOR_NECROSIS_FACTOR                                   | 270 | 0.41<br>5012 | 1.78<br>3573 | 0            | 0.01<br>1085 |
| GO_REGULATION_OF_T_CELL_CHEMOTAXIS                                     | 17  | 0.65<br>1483 | 1.78<br>2435 | 0.00<br>1534 | 0.01<br>1218 |
| GO_MYELOID_CELL_HOMEOSTASIS                                            | 129 | 0.44<br>1911 | 1.78<br>0089 | 0            | 0.01<br>1548 |
| GO_POSITIVE_REGULATION_OF_INTERLEUKIN_2_PRODUCTION                     | 25  | 0.58<br>961  | 1.77<br>9895 | 0.00<br>135  | 0.01<br>1547 |
| GO_ACTIN_FILAMENT_DEPOLYMERIZATION                                     | 51  | 0.50<br>46   | 1.77<br>9021 | 0            | 0.01<br>1624 |
| GO_POSITIVE_REGULATION_OF_RESPONSE_TO_EXTERNAL_STIMULUS                | 450 | 0.40<br>3897 | 1.77<br>7505 | 0            | 0.01<br>1852 |
| GO_REGULATION_OF_T_CELL_APOPTOTIC_PROCESS                              | 30  | 0.55<br>7991 | 1.77<br>6953 | 0.00<br>1479 | 0.01<br>1893 |
| GO_HUMORAL_IMMUNE_RESPONSE                                             | 223 | 0.41<br>9322 | 1.77<br>4268 | 0            | 0.01<br>2285 |
| GO_INTERACTION_WITH_HOST                                               | 187 | 0.41<br>7768 | 1.77<br>2131 | 0            | 0.01<br>2552 |
| GO_NEGATIVE_REGULATION_OF_CELLULAR_COMPONENT_MOVEMENT                  | 278 | 0.40<br>8549 | 1.77<br>0914 | 0            | 0.01<br>2713 |
| GO_REGULATION_OF_PEPTIDYL_TYROSINE_PHOSPHORYLATION                     | 235 | 0.41<br>4282 | 1.77<br>0778 | 0            | 0.01<br>2701 |
| GO_NEGATIVE_REGULATION_OF_HEMOPOIESIS                                  | 126 | 0.43<br>737  | 1.77<br>0628 | 0            | 0.01<br>2681 |
| GO_NEGATIVE_REGULATION_OF_MAPK_CASCADE                                 | 154 | 0.43<br>2882 | 1.76<br>9618 | 0            | 0.01<br>2824 |
| GO_REGULATION_OF_T_CELL_MEDIATED_IMMUNITY                              | 68  | 0.48<br>1108 | 1.76<br>8581 | 0            | 0.01<br>2957 |
| GO_REGULATION_OF_PRODUCTION_OF_MOLECULAR_MEDIATOR_OF_IMMUNE_RESPONSE   | 124 | 0.44<br>4529 | 1.76<br>8255 | 0            | 0.01<br>2991 |

|                                                                           |     |              |              |              |              |
|---------------------------------------------------------------------------|-----|--------------|--------------|--------------|--------------|
| GO_SUBSTRATE_ADHESION_DEPENDENT_CELL_SPREADING                            | 93  | 0.45<br>6121 | 1.76<br>547  | 0.00<br>2358 | 0.01<br>3364 |
| GO_POSITIVE_REGULATION_OF_T_CELL_CYTOKINE_PRODUCTION                      | 19  | 0.60<br>9047 | 1.76<br>3069 | 0.00<br>4405 | 0.01<br>377  |
| GO_POSITIVE_REGULATION_OF_CHEMOKINE_PRODUCTION                            | 55  | 0.49<br>5263 | 1.76<br>0298 | 0.00<br>1256 | 0.01<br>4184 |
| GO_NEGATIVE_REGULATION_OF_ADAPTIVE_IMMUNE_RESPONSE                        | 47  | 0.50<br>444  | 1.75<br>7414 | 0<br>4698    | 0.01         |
| GO_PH_REDUCTION                                                           | 53  | 0.49<br>7137 | 1.75<br>6732 | 0.00<br>1285 | 0.01<br>4765 |
| GO_REGULATION_OF_SYNCYTIUM_FORMATION_BY_PLASMA_MEMBRANE_FUSION            | 26  | 0.57<br>5044 | 1.75<br>586  | 0.00<br>1362 | 0.01<br>4901 |
| GO_NEGATIVE_REGULATION_OF_CD4_POSITIVE_ALPHA_BETA_T_CELL_ACTIVATION       | 24  | 0.58<br>3538 | 1.75<br>4122 | 0.00<br>4115 | 0.01<br>5258 |
| GO_INTERLEUKIN_7_MEDIATED_SIGNALING_PATHWAY                               | 17  | 0.63<br>284  | 1.75<br>2938 | 0.00<br>4666 | 0.01<br>5443 |
| GO_ENGULFMENT_OF_APOPTOTIC_CELL                                           | 15  | 0.65<br>0715 | 1.75<br>0655 | 0.00<br>8772 | 0.01<br>5859 |
| GO_REGULATION_OF_T_HELPER_1_TYPE_IMMUNE_RESPONSE                          | 26  | 0.57<br>1877 | 1.74<br>9945 | 0.00<br>411  | 0.01<br>5957 |
| GO_FC_RECEPTOR_SIGNALING_PATHWAY                                          | 169 | 0.41<br>7327 | 1.74<br>9322 | 0<br>6056    | 0.01         |
| GO_ACTIN_CYTOSKELETON_REORGANIZATION                                      | 93  | 0.45<br>225  | 1.74<br>896  | 0<br>6077    | 0.01         |
| GO_POSITIVE_REGULATION_OF_NF_KAPPAB_TRANSCRIPTION_FACTOR_ACTIVITY         | 145 | 0.42<br>5236 | 1.74<br>878  | 0.00<br>1125 | 0.01<br>61   |
| GO_REGULATION_OF_IMMUNOGLOBULIN_PRODUCTION                                | 54  | 0.49<br>8856 | 1.74<br>8402 | 0<br>613     | 0.01         |
| GO_INOSITOL_PHOSPHATE_BIOSYNTHETIC_PROCESS                                | 21  | 0.60<br>2027 | 1.74<br>802  | 0.00<br>554  | 0.01<br>6162 |
| GO_POSITIVE_REGULATION_OF_PEPTIDE_SECRETION                               | 196 | 0.41<br>6818 | 1.74<br>6387 | 0<br>6407    | 0.01         |
| GO_GLIAL_CELL_APOPTOTIC_PROCESS                                           | 15  | 0.64<br>8628 | 1.74<br>5926 | 0.00<br>4484 | 0.01<br>6461 |
| GO_REGULATION_OF_INNATE_IMMUNE_RESPONSE                                   | 267 | 0.40<br>2754 | 1.74<br>5505 | 0<br>6475    | 0.01         |
| GO_POSITIVE_REGULATION_OF_LEUKOCYTE_ADHESION_TO_VASCULAR_ENDOTHELIAL_CELL | 19  | 0.61<br>3552 | 1.74<br>5066 | 0.00<br>1447 | 0.01<br>6497 |
| GO_NEGATIVE_REGULATION_OF_DEFENSE_RESPONSE                                | 194 | 0.41<br>6694 | 1.74<br>4975 | 0<br>6464    | 0.01         |
| GO_POSITIVE_REGULATION_OF_EXTRINSIC_APOPTOTIC_SIGNALING_PATHWAY           | 50  | 0.49<br>5673 | 1.74<br>4507 | 0.00<br>1271 | 0.01<br>6503 |
| GO_NEGATIVE_REGULATION_OF_LEUKOCYTE_MIGRATION                             | 39  | 0.51<br>7401 | 1.74<br>4272 | 0.00<br>2649 | 0.01<br>6493 |



|                                                                               |     |              |              |              |              |
|-------------------------------------------------------------------------------|-----|--------------|--------------|--------------|--------------|
| GO_MODIFICATION_OF_SYNAPTIC_STRUCTURE                                         | 23  | 0.59<br>4902 | 1.74<br>3316 | 0.00<br>8403 | 0.01<br>6647 |
| GO_CHEMOKINE_BIOSYNTHETIC_PROCESS                                             | 15  | 0.65<br>3308 | 1.74<br>2113 | 0.00<br>1495 | 0.01<br>6845 |
| GO_PLATELET_ACTIVATION                                                        | 146 | 0.42<br>7054 | 1.74<br>0581 | 0<br>7101    | 0.01         |
| GO_REGULATION_OF_ACTIN_FILAMENT_ORGANIZATION                                  | 225 | 0.41<br>0841 | 1.73<br>9096 | 0<br>7388    | 0.01         |
| GO_RELEASE_OF_CYTOCHROME_C_FROM_MITOCHONDRIA                                  | 53  | 0.48<br>8179 | 1.73<br>8357 | 0.00<br>1305 | 0.01<br>7483 |
| GO_NEGATIVE_REGULATION_OF_LEUKOCYTE_MEDIATED_CYTOTOXICITY                     | 20  | 0.60<br>3339 | 1.73<br>8092 | 0.00<br>3021 | 0.01<br>7513 |
| GO_REGULATION_OF_MYELOID_CELL_DIFFERENTIATION                                 | 193 | 0.41<br>3069 | 1.73<br>7771 | 0<br>7554    | 0.01         |
| GO_RECEPTOR_SIGNALING_PATHWAY_VIA_STAT                                        | 144 | 0.42<br>497  | 1.73<br>2489 | 0<br>8579    | 0.01         |
| GO_MACROPHAGE_CHEMOTAXIS                                                      | 34  | 0.53<br>2818 | 1.72<br>8947 | 0.00<br>3922 | 0.01<br>9367 |
| GO_POSITIVE_REGULATION_OF_JNK_CASCADE                                         | 126 | 0.42<br>5184 | 1.72<br>758  | 0<br>9686    | 0.01         |
| GO_REGULATION_OF_GTPASE_ACTIVITY                                              | 376 | 0.39<br>2732 | 1.72<br>6301 | 0<br>9932    | 0.01         |
| GO_REGULATION_OF_ACTIN_FILAMENT_BASED_PROCESS                                 | 336 | 0.39<br>5743 | 1.72<br>6184 | 0<br>9899    | 0.01         |
| GO_REGULATION_OF_CELLULAR_EXTRAVASATION                                       | 31  | 0.54<br>3783 | 1.72<br>6056 | 0.00<br>2755 | 0.01<br>9878 |
| GO_T_CELL_CYTOKINE_PRODUCTION                                                 | 42  | 0.50<br>8448 | 1.72<br>4904 | 0.00<br>1295 | 0.02<br>008  |
| GO_NEGATIVE_REGULATION_OF_PRODUCTION_OF_MOLECULAR_MEDIATOR_OF_IMMUNE_RESPONSE | 35  | 0.53<br>8066 | 1.72<br>3849 | 0.00<br>267  | 0.02<br>0286 |
| GO_REGULATION_OF_EXTRACELLULAR_MATRIX_ORGANIZATION                            | 34  | 0.52<br>4312 | 1.72<br>3463 | 0.00<br>4027 | 0.02<br>0319 |
| GO_POSITIVE_REGULATION_OF_CALCIIUM_ION_IMPORT                                 | 19  | 0.60<br>6015 | 1.72<br>1642 | 0.00<br>8889 | 0.02<br>0805 |
| GO_POSITIVE_REGULATION_OF_GLIOGENESIS                                         | 65  | 0.47<br>9599 | 1.71<br>7735 | 0.00<br>1284 | 0.02<br>1608 |
| GO_CD40_SIGNALING_PATHWAY                                                     | 15  | 0.64<br>6448 | 1.71<br>7725 | 0.00<br>3115 | 0.02<br>155  |
| GO GRANULOCYTE DIFFERENTIATION                                                | 34  | 0.52<br>9609 | 1.71<br>6487 | 0.00<br>1366 | 0.02<br>1757 |
| GO_TISSUE_REMODELING                                                          | 152 | 0.42<br>084  | 1.71<br>6466 | 0<br>1701    | 0.02         |
| GO_NEGATIVE_REGULATION_OF_ENDOCYTOSIS                                         | 39  | 0.51<br>0216 | 1.71<br>485  | 0.00<br>406  | 0.02<br>205  |

|                                                                           |     |      |      |      |      |
|---------------------------------------------------------------------------|-----|------|------|------|------|
| GO_WOUND_HEALING                                                          | 461 | 0.38 | 1.71 | 0    | 0.02 |
|                                                                           |     | 6492 | 2691 |      | 2576 |
| GO_POSITIVE_REGULATION_OF_DEFENSE_RESPONSE                                | 328 | 0.39 | 1.71 | 0    | 0.02 |
|                                                                           |     | 241  | 0635 |      | 3018 |
| GO_REGULATION_OF_T_HELPER_CELL_DIFFERENTIATION                            | 33  | 0.52 | 1.71 | 0.00 | 0.02 |
|                                                                           |     | 5842 | 0506 | 1364 | 3002 |
| GO_DEFENSE_RESPONSE_TO_BACTERIUM                                          | 200 | 0.40 | 1.71 | 0    | 0.02 |
|                                                                           |     | 689  | 0415 |      | 2946 |
| GO_TUMOR_NECROSIS_FACTOR_MEDIATED_SIGNALING_PATHWAY                       | 153 | 0.41 | 1.70 | 0    | 0.02 |
|                                                                           |     | 3463 | 7491 |      | 36   |
| GO_REGULATION_OF_AMINO_ACID_TRANSPORT                                     | 35  | 0.51 | 1.70 | 0.00 | 0.02 |
|                                                                           |     | 7422 | 5603 | 6579 | 4116 |
| GO_MYELOID_CELL_DEVELOPMENT                                               | 58  | 0.47 | 1.70 | 0    | 0.02 |
|                                                                           |     | 5433 | 4868 |      | 4262 |
| GO_POSITIVE_REGULATION_OF_NATURAL_KILLER_CELL_ACTIVATION                  | 19  | 0.60 | 1.70 | 0.01 | 0.02 |
|                                                                           |     | 4471 | 4523 | 2552 | 4302 |
| GO_REGULATION_OF_CELL_SUBSTRATE_JUNCTION_ORGANIZATION                     | 59  | 0.47 | 1.70 | 0.00 | 0.02 |
|                                                                           |     | 0557 | 4039 | 2591 | 4368 |
| GO_PROGRAMMED_NECROTIC_CELL_DEATH                                         | 39  | 0.49 | 1.70 | 0.00 | 0.02 |
|                                                                           |     | 9433 | 3535 | 1314 | 4435 |
| GO_POSITIVE_REGULATION_OF_ESTABLISHMENT_OF_PROTEIN_LOCALIZATION           | 340 | 0.38 | 1.70 | 0    | 0.02 |
|                                                                           |     | 7422 | 3477 |      | 4393 |
| GO_RESPONSE_TO_INTERLEUKIN_1                                              | 189 | 0.40 | 1.70 | 0    | 0.02 |
|                                                                           |     | 6178 | 1985 |      | 4779 |
| GO_NEGATIVE_REGULATION_OF_MAP_KINASE_ACTIVITY                             | 72  | 0.46 | 1.70 | 0.00 | 0.02 |
|                                                                           |     | 0444 | 1872 | 1221 | 4752 |
| GO_T_HELPER_2_CELL_CYTOKINE_PRODUCTION                                    | 15  | 0.63 | 1.70 | 0.01 | 0.02 |
|                                                                           |     | 431  | 1687 | 0417 | 4734 |
| GO_POSITIVE_REGULATION_OF_RELEASE_OF_SEQUESTERED_CALCIUM_ION_INTO_CYTOSOL | 36  | 0.52 | 1.70 | 0.00 | 0.02 |
|                                                                           |     | 0234 | 1347 | 2567 | 4749 |
| GO_REGULATION_OF_ERBB_SIGNALING_PATHWAY                                   | 84  | 0.44 | 1.70 | 0.00 | 0.02 |
|                                                                           |     | 133  | 1297 | 1203 | 4693 |
| GO_NEGATIVE_REGULATION_OF_INNATE_IMMUNE_RESPONSE                          | 55  | 0.47 | 1.70 | 0    | 0.02 |
|                                                                           |     | 2336 | 0721 |      | 4784 |
| GO_PRODUCTION_OF_MOLECULAR_MEDIATOR_OF_IMMUNE_RESPONSE                    | 187 | 0.40 | 1.70 | 0    | 0.02 |
|                                                                           |     | 7807 | 0374 |      | 48   |
| GO_NEGATIVE_REGULATION_OF_B_CELL_PROLIFERATION                            | 17  | 0.60 | 1.70 | 0.01 | 0.02 |
|                                                                           |     | 9459 | 0045 | 1799 | 4819 |
| GO_CELL_MATRIX_ADHESION                                                   | 203 | 0.40 | 1.69 | 0    | 0.02 |
|                                                                           |     | 4357 | 9997 |      | 4774 |
| GO_ENDOCYTIC_RECYCLING                                                    | 42  | 0.49 | 1.69 | 0.00 | 0.02 |
|                                                                           |     | 9227 | 8901 | 3932 | 5026 |
| GO_REGULATION_OF_OSTEOCLAST_DIFFERENTIATION                               | 60  | 0.47 | 1.69 | 0.00 | 0.02 |
|                                                                           |     | 5158 | 8752 | 1253 | 5008 |

|                                                                                   |     |      |      |      |      |
|-----------------------------------------------------------------------------------|-----|------|------|------|------|
| GO_POSITIVE_REGULATION_OF_PROTEIN_KINASE_B_SIGNALING                              | 159 | 0.41 | 1.69 | 0    | 0.02 |
|                                                                                   |     | 4251 | 8388 |      | 5037 |
| GO_IMMUNOGLOBULIN_PRODUCTION                                                      | 100 | 0.43 | 1.69 | 0    | 0.02 |
|                                                                                   |     | 6857 | 6441 |      | 5582 |
| GO_VACUOLE_ORGANIZATION                                                           | 133 | 0.42 | 1.69 | 0    | 0.02 |
|                                                                                   |     | 0009 | 6288 |      | 5553 |
| GO_REGULATION_OF_CALCIUM_ION_TRANSPORT_INTO_CYTOSOL                               | 87  | 0.44 | 1.69 | 0.00 | 0.02 |
|                                                                                   |     | 1746 | 6049 | 346  | 5562 |
| GO_NEGATIVE_REGULATION_OF_INTERLEUKIN_2_PRODUCTION                                | 19  | 0.59 | 1.69 | 0.01 | 0.02 |
|                                                                                   |     | 3284 | 5563 | 7467 | 5629 |
| GO_REGULATION_OF_VESICLE_FUSION                                                   | 27  | 0.55 | 1.69 | 0.00 | 0.02 |
|                                                                                   |     | 0435 | 5038 | 1422 | 5691 |
| GO_ACTIVATION_OF_CYSINE_TYPE_ENDOPEPTIDASE_ACTIVITY_INVOLVED_IN_APOPTOTIC_PROCESS | 74  | 0.45 | 1.69 | 0    | 0.02 |
|                                                                                   |     | 2638 | 3568 |      | 6085 |
| GO_REGULATION_OF_RESPONSE_TO_CYTOKINE_STIMULUS                                    | 149 | 0.41 | 1.69 | 0    | 0.02 |
|                                                                                   |     | 5541 | 3062 |      | 618  |
| GO_POSITIVE_REGULATION_OF_CELLULAR_COMPONENT_MOVEMENT                             | 482 | 0.38 | 1.69 | 0    | 0.02 |
|                                                                                   |     | 0844 | 0928 |      | 6713 |
| GO_POSITIVE_REGULATION_OF_ALCOHOL_BIOSYNTHETIC_PROCESS                            | 24  | 0.55 | 1.68 | 0.01 | 0.02 |
|                                                                                   |     | 6706 | 9464 | 3928 | 7058 |
| GO_CALCIUM_MEDIATED_SIGNALING                                                     | 185 | 0.40 | 1.68 | 0    | 0.02 |
|                                                                                   |     | 5889 | 9257 |      | 7063 |
| GO_NEGATIVE_REGULATION_OF_B_CELL_ACTIVATION                                       | 32  | 0.52 | 1.68 | 0.00 | 0.02 |
|                                                                                   |     | 6841 | 8503 | 9472 | 721  |
| GO_REGULATION_OF_VESICLE_MEDIATED_TRANSPORT                                       | 500 | 0.38 | 1.68 | 0    | 0.02 |
|                                                                                   |     | 2064 | 8194 |      | 7234 |
| GO_I_KAPPAB_KINASE_NF_KAPPAB_SIGNALING                                            | 243 | 0.39 | 1.68 | 0    | 0.02 |
|                                                                                   |     | 4415 | 8016 |      | 7247 |
| GO_CELL_ADHESION_MEDIATED_BY_INTEGRIN                                             | 63  | 0.46 | 1.68 | 0.00 | 0.02 |
|                                                                                   |     | 3553 | 5468 | 1267 | 7919 |
| GO_RESPONSE_TO_PROTOZOAN                                                          | 23  | 0.56 | 1.68 | 0.00 | 0.02 |
|                                                                                   |     | 4215 | 5465 | 7205 | 7852 |
| GO_REGULATION_OF_ANION_TRANSMEMBRANE_TRANSPORT                                    | 27  | 0.54 | 1.68 | 0.00 | 0.02 |
|                                                                                   |     | 4399 | 475  | 9972 | 7994 |
| GO_NEGATIVE_REGULATION_OF_RESPONSE_TO_EXTERNAL_STIMULUS                           | 343 | 0.38 | 1.68 | 0    | 0.02 |
|                                                                                   |     | 4972 | 3506 |      | 8305 |
| GO_NEGATIVE_REGULATION_OF_CHEMOTAXIS                                              | 54  | 0.47 | 1.68 | 0.00 | 0.02 |
|                                                                                   |     | 2653 | 2918 | 1258 | 8431 |
| GO_HOMEOSTASIS_OF_NUMBER_OF_CELLS                                                 | 220 | 0.39 | 1.68 | 0    | 0.02 |
|                                                                                   |     | 4772 | 1965 |      | 8681 |
| GO_SNARE_COMPLEX_ASSEMBLY                                                         | 16  | 0.60 | 1.68 | 0.00 | 0.02 |
|                                                                                   |     | 9555 | 19   | 1479 | 8622 |
| GO_PROTEIN_KINASE_B_SIGNALING                                                     | 231 | 0.39 | 1.68 | 0    | 0.02 |
|                                                                                   |     | 5972 | 1656 |      | 863  |

|                                                                                    |     |              |              |              |              |
|------------------------------------------------------------------------------------|-----|--------------|--------------|--------------|--------------|
| GO_POSITIVE_REGULATION_OF_CYTOKINE_PRODUCTION_INVOLVED_IN_INFLAMMATORY_RESPONSE    | 20  | 0.58<br>8124 | 1.68<br>1324 | 0.01<br>059  | 0.02<br>8658 |
| GO_NEGATIVE_REGULATION_OF_CALCIIUM_MEDIATED_SIGNALING                              | 25  | 0.54<br>5743 | 1.68<br>0053 | 0.00<br>5502 | 0.02<br>8993 |
| GO_POSITIVE_REGULATION_OF_CALCIIUM_ION_TRANSPORT_INTO_CYTOSOL                      | 50  | 0.47<br>8881 | 1.67<br>9168 | 0.00<br>8906 | 0.02<br>914  |
| GO_ACTIN_FILAMENT_ORGANIZATION                                                     | 357 | 0.38<br>2455 | 1.67<br>9073 | 0<br>        | 0.02<br>9102 |
| GO_TOLL_LIKE_RECEPTOR_4_SIGNALING_PATHWAY                                          | 31  | 0.52<br>2801 | 1.67<br>8621 | 0.00<br>8499 | 0.02<br>9176 |
| GO_NEGATIVE_REGULATION_OF_CYTOKINE_SECRETION                                       | 24  | 0.55<br>6892 | 1.67<br>8169 | 0.01<br>264  | 0.02<br>9274 |
| GO_REGULATION_OF_MONOCYTE_CHEMOTAXIS                                               | 20  | 0.57<br>9278 | 1.67<br>7795 | 0.01<br>2931 | 0.02<br>9316 |
| GO_INACTIVATION_OF_MAPK_ACTIVITY                                                   | 25  | 0.55<br>1683 | 1.67<br>6631 | 0.01<br>2097 | 0.02<br>9662 |
| GO_OSTEOCLAST_DIFFERENTIATION                                                      | 88  | 0.44<br>3222 | 1.67<br>5348 | 0<br>        | 0.02<br>9947 |
| GO_POSITIVE_REGULATION_OF_GTPASE_ACTIVITY                                          | 311 | 0.38<br>628  | 1.67<br>5198 | 0<br>        | 0.02<br>9931 |
| GO_NEGATIVE_REGULATION_OF_LYMPHOCYTE_APOPTOTIC_PROCESS                             | 28  | 0.53<br>997  | 1.67<br>4108 | 0.00<br>1418 | 0.03<br>0209 |
| GO_POSITIVE_REGULATION_OF_MYELOID_LEUKOCYTE_MEDIATED_IMMUNITY                      | 30  | 0.52<br>6473 | 1.67<br>3502 | 0.01<br>1189 | 0.03<br>0331 |
| GO_REGULATION_OF_EXOCYTOSIS                                                        | 204 | 0.39<br>5912 | 1.67<br>1433 | 0<br>        | 0.03<br>0951 |
| GO_RESPONSE_TO_INTERLEUKIN_12                                                      | 46  | 0.48<br>8655 | 1.67<br>1179 | 0.00<br>1312 | 0.03<br>0984 |
| GO_POSITIVE_REGULATION_OF_RECEPTOR_SIGNALING_PATHWAY_VIA_STAT                      | 86  | 0.43<br>348  | 1.66<br>9516 | 0.00<br>3632 | 0.03<br>1516 |
| GO_ASTROCYTE_ACTIVATION                                                            | 22  | 0.56<br>314  | 1.66<br>9198 | 0.00<br>561  | 0.03<br>1578 |
| GO_NECROTIC_CELL_DEATH                                                             | 47  | 0.48<br>6445 | 1.66<br>8917 | 0.00<br>2551 | 0.03<br>1605 |
| GO_NEGATIVE_REGULATION_OF_SECRETION                                                | 165 | 0.40<br>2414 | 1.66<br>8869 | 0<br>        | 0.03<br>1555 |
| GO_REGULATION_OF_SYSTEMIC_ARTERIAL_BLOOD_PRESSURE_BY_CIRCULATORY_RENIN_ANGIOTENSIN | 18  | 0.59<br>1578 | 1.66<br>8411 | 0.00<br>6051 | 0.03<br>1658 |
| GO_POSITIVE_REGULATION_OF_CELL_ADHESION_MEDIATED_BY_INTEGRIN                       | 19  | 0.59<br>7994 | 1.66<br>8068 | 0.01<br>0279 | 0.03<br>1692 |
| GO_POSITIVE_REGULATION_OF_SECRETION                                                | 338 | 0.38<br>1607 | 1.66<br>5973 | 0<br>        | 0.03<br>2353 |
| GO_REGULATION_OF_CYSSTEINE_TYPE_ENDOPEPTIDASE_ACTIVITY                             | 208 | 0.39<br>3309 | 1.66<br>4774 | 0<br>        | 0.03<br>2686 |

|                                                                                |     |      |      |      |      |
|--------------------------------------------------------------------------------|-----|------|------|------|------|
| GO_POSITIVE_REGULATION_OF_CYSTEINE_TYPE_ENDOPEPTIDASE_ACTIVITY                 | 130 | 0.41 | 1.66 | 0    | 0.03 |
|                                                                                |     | 5583 | 469  |      | 265  |
| GO_POSITIVE_REGULATION_OF_I_KAPPAB_KINASE_NF_KAPPAB_SIGNALING                  | 165 | 0.40 | 1.66 | 0.00 | 0.03 |
|                                                                                |     | 2573 | 4446 | 1095 | 2658 |
| GO_NEGATIVE_REGULATION_OF_RESPONSE_TO_BIOTIC_STIMULUS                          | 86  | 0.43 | 1.66 | 0    | 0.03 |
|                                                                                |     | 7133 | 4414 |      | 26   |
| GO_MEMBRANE_PROTEIN_ECTODOMAIN_PROTEOLYSIS                                     | 39  | 0.49 | 1.66 | 0.00 | 0.03 |
|                                                                                |     | 7121 | 4281 | 9126 | 257  |
| GO_NEGATIVE_REGULATION_OF_LEUKOCYTE_CHEMOTAXIS                                 | 15  | 0.62 | 1.66 | 0.01 | 0.03 |
|                                                                                |     | 0413 | 419  | 0279 | 2524 |
| GO_POSITIVE_REGULATION_OF_CALCIUM_ION_TRANSPORT                                | 108 | 0.41 | 1.66 | 0.00 | 0.03 |
|                                                                                |     | 5979 | 1658 | 1127 | 336  |
| GO_POSITIVE_REGULATION_OF_CELL_SUBSTRATE_ADHESION                              | 113 | 0.41 | 1.66 | 0.00 | 0.03 |
|                                                                                |     | 8263 | 0837 | 3444 | 3599 |
| GO_BONE_CELL_DEVELOPMENT                                                       | 29  | 0.52 | 1.66 | 0.00 | 0.03 |
|                                                                                |     | 5172 | 0476 | 1387 | 3632 |
| GO_NEGATIVE_REGULATION_OF_T_CELL_MEDIATED_IMMUNITY                             | 18  | 0.59 | 1.66 | 0.00 | 0.03 |
|                                                                                |     | 9531 | 0456 | 8824 | 3564 |
| GO_POSITIVE_REGULATION_OF_REACTIVE_OXYGEN_SPECIES_METABOLIC_PROCESS            | 90  | 0.42 | 1.65 | 0.00 | 0.03 |
|                                                                                |     | 9329 | 7936 | 119  | 4333 |
| GO_INTERLEUKIN_17_PRODUCTION                                                   | 32  | 0.51 | 1.65 | 0.00 | 0.03 |
|                                                                                |     | 3395 | 7819 | 6803 | 429  |
| GO_NEGATIVE_REGULATION_OF_AMYLOID_PRECURSOR_PROTEIN_CATABOLIC_PROCESS          | 16  | 0.60 | 1.65 | 0.01 | 0.03 |
|                                                                                |     | 5884 | 7573 | 62   | 4287 |
| GO_REGULATION_OF_ENDOCYTOSIS                                                   | 193 | 0.39 | 1.65 | 0    | 0.03 |
|                                                                                |     | 1862 | 714  |      | 4372 |
| GO_REGULATION_OF_VASCULAR_ENDOTHELIAL_GROWTH_FACTOR_RECEPTOR_SIGNALING_PATHWAY | 25  | 0.54 | 1.65 | 0.00 | 0.03 |
|                                                                                |     | 558  | 5923 | 672  | 4727 |
| GO_NEGATIVE_REGULATION_OF_PHOSPHORUS_METABOLIC_PROCESS                         | 463 | 0.37 | 1.65 | 0    | 0.03 |
|                                                                                |     | 3084 | 5864 |      | 4668 |
| GO_LEUKOCYTE_TETHERING_OR_ROLLING                                              | 28  | 0.53 | 1.65 | 0.00 | 0.03 |
|                                                                                |     | 1551 | 5311 | 5731 | 4815 |
| GO_RESPONSE_TO_PROSTAGLANDIN                                                   | 31  | 0.51 | 1.65 | 0.01 | 0.03 |
|                                                                                |     | 4832 | 511  | 105  | 4836 |
| GO_REGULATION_OF_CELL_ADHESION_MEDIATED_BY_INTEGRIN                            | 43  | 0.48 | 1.65 | 0.00 | 0.03 |
|                                                                                |     | 5542 | 4325 | 5222 | 5079 |
| GO_RECEPTOR_BIOSYNTHETIC_PROCESS                                               | 23  | 0.55 | 1.65 | 0.00 | 0.03 |
|                                                                                |     | 2178 | 4093 | 9929 | 5104 |
| GO_MYD88_DEPENDENT_TOLL_LIKE_RECEPTOR_SIGNALING_PATHWAY                        | 33  | 0.50 | 1.65 | 0.00 | 0.03 |
|                                                                                |     | 7365 | 2995 | 5556 | 5418 |
| GO_MHC_CLASS_II_BIOSYNTHETIC_PROCESS                                           | 16  | 0.60 | 1.65 | 0.00 | 0.03 |
|                                                                                |     | 8768 | 1561 | 8772 | 5897 |
| GO_POSITIVE_REGULATION_OF_NITRIC_OXIDE_SYNTHASE_BIOSYNTHETIC_PROCESS           | 15  | 0.62 | 1.65 | 0.01 | 0.03 |
|                                                                                |     | 2977 | 1237 | 4749 | 5917 |

|                                                                                                                                           |     |              |              |              |              |
|-------------------------------------------------------------------------------------------------------------------------------------------|-----|--------------|--------------|--------------|--------------|
| GO_REGULATION_OF_MONOOXYGENASE_ACTIVITY                                                                                                   | 55  | 0.46<br>2008 | 1.65<br>0682 | 0.00<br>3741 | 0.03<br>6049 |
| GO_POSITIVE_REGULATION_OF_MAPK_CASCADE                                                                                                    | 473 | 0.37<br>1566 | 1.64<br>8297 | 0            | 0.03<br>6851 |
| GO_NEGATIVE_REGULATION_OF_INTERLEUKIN_1_PRODUCTION                                                                                        | 25  | 0.54<br>7708 | 1.64<br>8043 | 0.00<br>5479 | 0.03<br>687  |
| GO_REGULATION_OF_NATURAL_KILLER_CELL_MEDIATED_IMMUNITY                                                                                    | 40  | 0.48<br>5824 | 1.64<br>7406 | 0.00<br>6631 | 0.03<br>7007 |
| GO_T_HELPER_1_CELL_DIFFERENTIATION                                                                                                        | 16  | 0.60<br>2674 | 1.64<br>6881 | 0.01<br>4684 | 0.03<br>7126 |
| GO_SOMATIC_DIVERSIFICATION_OF_IMMUNOGLOBULINS                                                                                             | 55  | 0.46<br>1982 | 1.64<br>6604 | 0.00<br>2506 | 0.03<br>7156 |
| GO_MODULATION_BY_HOST_OF_VIRAL_PROCESS                                                                                                    | 27  | 0.53<br>7056 | 1.64<br>2171 | 0.01<br>0929 | 0.03<br>8806 |
| GO_TOLL_LIKE_RECEPTOR_SIGNALING_PATHWAY                                                                                                   | 129 | 0.40<br>8851 | 1.64<br>06   | 0            | 0.03<br>9347 |
| GO_NEGATIVE_REGULATION_OF_PHOSPHORYLATION                                                                                                 | 381 | 0.37<br>2142 | 1.63<br>9348 | 0            | 0.03<br>9841 |
| GO_POSITIVE_REGULATION_OF_SUPRAMOLECULAR_FIBER_ORGANIZATION                                                                               | 173 | 0.39<br>4919 | 1.63<br>8718 | 0.00<br>1085 | 0.04<br>0017 |
| GO_STRESS_FIBER_ASSEMBLY                                                                                                                  | 88  | 0.42<br>66   | 1.63<br>8237 | 0.00<br>2361 | 0.04<br>0124 |
| GO_POSITIVE_REGULATION_OF_T_HELPER_1_TYPE_IMMUNE_RESPONSE                                                                                 | 19  | 0.56<br>9506 | 1.63<br>7722 | 0.01<br>3025 | 0.04<br>022  |
| GO_RUFFLE_ORGANIZATION                                                                                                                    | 44  | 0.48<br>2288 | 1.63<br>715  | 0.00<br>3953 | 0.04<br>0331 |
| GO_REGULATION_OF_CALCIIUM_ION_TRANSPORT                                                                                                   | 218 | 0.38<br>4434 | 1.63<br>6861 | 0            | 0.04<br>0375 |
| GO_NEGATIVE_REGULATION_OF_NATURAL_KILLER_CELL_MEDIATED_IMMUNITY                                                                           | 17  | 0.59<br>3246 | 1.63<br>551  | 0.00<br>8876 | 0.04<br>0817 |
| GO_BARBED_END_ACTIN_FILAMENT_CAPPING                                                                                                      | 21  | 0.55<br>6646 | 1.63<br>5442 | 0.01<br>4306 | 0.04<br>0751 |
| GO_PEPTIDYL_TYROSINE_AUTOPHOSPHORYLATION                                                                                                  | 41  | 0.47<br>7945 | 1.63<br>465  | 0.00<br>9309 | 0.04<br>0979 |
| GO_REGULATION_OF_T_CELL_DIFFERENTIATION_IN_THYMUS                                                                                         | 23  | 0.53<br>5961 | 1.63<br>4445 | 0.00<br>9459 | 0.04<br>1003 |
| GO_MATURE_B_CELL_DIFFERENTIATION_INVOLVED_IN_IMMUNE_RESPONSE                                                                              | 20  | 0.56<br>5146 | 1.63<br>2438 | 0.02<br>1521 | 0.04<br>1833 |
| GO_POSITIVE_REGULATION_OF_LEUKOCYTE_APOPTOTIC_PROCESS                                                                                     | 24  | 0.53<br>9212 | 1.63<br>2424 | 0.00<br>2833 | 0.04<br>1752 |
| GO_POSITIVE_REGULATION_OF_CYTOSOLIC_CALCIIUM_ION_CONCENTRATION_INVOLVED_IN_PHOSPHOLIPASE_C_ACTIVATING_G_PROTEIN_COUPLED_SIGNALING_PATHWAY | 28  | 0.52<br>1946 | 1.63<br>1468 | 0.00<br>9485 | 0.04<br>2031 |
| GO_POSITIVE_REGULATION_OF_PEPTIDYL_TYROSINE_PHOSPHORYLATION                                                                               | 177 | 0.39<br>2943 | 1.63<br>1226 | 0            | 0.04<br>2033 |

|                                                                             |     |              |              |              |              |
|-----------------------------------------------------------------------------|-----|--------------|--------------|--------------|--------------|
| GO_RESPONSE_TO_INTERLEUKIN_7                                                | 27  | 0.53<br>079  | 1.63<br>0496 | 0.01<br>0944 | 0.04<br>225  |
| GO_POSITIVE_REGULATION_OF_ACTIN_FILAMENT_BUNDLE_ASSEMBLY                    | 55  | 0.45<br>4771 | 1.62<br>9424 | 0.00<br>507  | 0.04<br>2651 |
| GO_ANIMAL_ORGAN_REGENERATION                                                | 68  | 0.44<br>4222 | 1.62<br>9071 | 0.00<br>3695 | 0.04<br>2711 |
| GO_REGULATION_OF_RELEASE_OF_CYTOCHROME_C_FROM_MITOCHONDRIA                  | 43  | 0.47<br>6564 | 1.62<br>8617 | 0.01<br>0796 | 0.04<br>2772 |
| GO_ERYTHROCYTE_HOMEOSTASIS                                                  | 107 | 0.41<br>565  | 1.62<br>832  | 0            | 0.04<br>2827 |
| GO_EXTRINSIC_APOPTOTIC_SIGNALING_PATHWAY_VIA_DEATH_DOMAIN_RECEPTORS         | 81  | 0.43<br>2282 | 1.62<br>7823 | 0.00<br>3584 | 0.04<br>2951 |
| GO_ACTIVATION_OF_INNATE_IMMUNE_RESPONSE                                     | 124 | 0.40<br>5604 | 1.62<br>6613 | 0            | 0.04<br>3412 |
| GO_PROTEIN_LOCALIZATION_TO_CELL_SURFACE                                     | 59  | 0.45<br>572  | 1.62<br>6095 | 0.00<br>4914 | 0.04<br>359  |
| GO_MORPHOGENESIS_OF_A_POLARIZED_EPITHELIUM                                  | 137 | 0.39<br>9705 | 1.62<br>5817 | 0.00<br>1133 | 0.04<br>3636 |
| GO_PLASMA_MEMBRANE_TUBULATION                                               | 15  | 0.59<br>3889 | 1.62<br>4836 | 0.01<br>4577 | 0.04<br>3942 |
| GO_RAS_PROTEIN_SIGNAL_TRANSDUCTION                                          | 300 | 0.37<br>4858 | 1.62<br>4472 | 0            | 0.04<br>4036 |
| GO_PROTEIN_POLYMERIZATION                                                   | 241 | 0.38<br>0823 | 1.62<br>4327 | 0            | 0.04<br>402  |
| GO_REGULATION_OF_COAGULATION                                                | 81  | 0.42<br>3824 | 1.62<br>4065 | 0.00<br>8343 | 0.04<br>4064 |
| GO_SOMATIC_RECOMBINATION_OF_IMMUNOGLOBULIN_GENE_SEGMENTS                    | 48  | 0.46<br>3626 | 1.62<br>3675 | 0.00<br>5109 | 0.04<br>4145 |
| GO_VACUOLAR_ACIDIFICATION                                                   | 21  | 0.56<br>2928 | 1.62<br>2605 | 0.01<br>2784 | 0.04<br>4558 |
| GO_MYOBlast_DIFFERENTIATION                                                 | 78  | 0.42<br>4861 | 1.62<br>2429 | 0.00<br>2463 | 0.04<br>4539 |
| GO_POSITIVE_REGULATION_OF_SMALL_GTPASE_MEDIATED_SIGNAL_TRANSDUCTION         | 68  | 0.43<br>5288 | 1.62<br>1286 | 0.00<br>1235 | 0.04<br>4975 |
| GO_REGULATION_OF_LEUKOCYTE_ADHESION_TO_VASCULAR_ENDOTHELIAL_CELL            | 25  | 0.53<br>1687 | 1.62<br>0553 | 0.01<br>3717 | 0.04<br>5171 |
| GO_POSITIVE_REGULATION_OF_LEUKOCYTE_DEGRANULATION                           | 23  | 0.54<br>0322 | 1.62<br>0329 | 0.01<br>2968 | 0.04<br>5192 |
| GO_RESPONSE_TO_PROSTAGLANDIN_E                                              | 24  | 0.53<br>8884 | 1.62<br>0136 | 0.01<br>983  | 0.04<br>52   |
| GO_CELL_SUBSTRATE_JUNCTION_ORGANIZATION                                     | 91  | 0.41<br>6934 | 1.61<br>9856 | 0.00<br>1167 | 0.04<br>5228 |
| GO_POSITIVE_REGULATION_OF_STRESS_ACTIVATED_PROTEIN_KINASE_SIGNALING_CASCADE | 148 | 0.40<br>0387 | 1.61<br>9692 | 0            | 0.04<br>5206 |

|                                                         |     |      |      |      |      |
|---------------------------------------------------------|-----|------|------|------|------|
| GO_POSITIVE_REGULATION_OF_ISOTYPE_SWITCHING             | 21  | 0.55 | 1.61 | 0.01 | 0.04 |
|                                                         |     | 2388 | 9584 | 7751 | 5169 |
| GO_REGULATION_OF_MYOBLAST_FUSION                        | 20  | 0.56 | 1.61 | 0.01 | 0.04 |
|                                                         |     | 3717 | 9424 | 3889 | 5143 |
| GO_REGULATION_OF_LONG_TERM_SYNAPTIC_POTENTIATION        | 45  | 0.47 | 1.61 | 0.01 | 0.04 |
|                                                         |     | 5448 | 8787 | 3175 | 5347 |
| GO_ACTIN_FILAMENT_BUNDLE_ORGANIZATION                   | 134 | 0.39 | 1.61 | 0.00 | 0.04 |
|                                                         |     | 967  | 7729 | 225  | 5784 |
| GO_POSITIVE_REGULATION_OF_INTERLEUKIN_12_PRODUCTION     | 32  | 0.50 | 1.61 | 0.01 | 0.04 |
|                                                         |     | 42   | 7536 | 0667 | 5789 |
| GO_REGULATION_OF_REGULATED_SECRETORY_PATHWAY            | 150 | 0.39 | 1.61 | 0.00 | 0.04 |
|                                                         |     | 1678 | 7229 | 1114 | 5837 |
| GO_PIGMENT_GRANULE_LOCALIZATION                         | 23  | 0.54 | 1.61 | 0.01 | 0.04 |
|                                                         |     | 321  | 7222 | 2857 | 5748 |
| GO_NEGATIVE_REGULATION_OF_PHAGOCYTOSIS                  | 16  | 0.59 | 1.61 | 0.01 | 0.04 |
|                                                         |     | 469  | 6775 | 9316 | 5843 |
| GO_ASTROCYTE_DIFFERENTIATION                            | 78  | 0.42 | 1.61 | 0.00 | 0.04 |
|                                                         |     | 6806 | 6457 | 2427 | 5876 |
| GO_NEGATIVE_REGULATION_OF_CELL_KILLING                  | 23  | 0.54 | 1.61 | 0.01 | 0.04 |
|                                                         |     | 5276 | 618  | 3986 | 5923 |
| GO_REGULATION_OF_SUPRAMOLECULAR_FIBER_ORGANIZATION      | 301 | 0.37 | 1.61 | 0    | 0.04 |
|                                                         |     | 1647 | 6146 |      | 5844 |
| GO_JNK_CASCADE                                          | 191 | 0.38 | 1.61 | 0    | 0.04 |
|                                                         |     | 2453 | 5184 |      | 6188 |
| GO_EXTRINSIC_APOPTOTIC_SIGNALING_PATHWAY                | 213 | 0.37 | 1.61 | 0    | 0.04 |
|                                                         |     | 6945 | 4537 |      | 6421 |
| GO_BLOOD_VESSEL_REMODELING                              | 40  | 0.47 | 1.61 | 0.00 | 0.04 |
|                                                         |     | 945  | 4257 | 8163 | 6466 |
| GO_REGULATION_OF_RECEPTOR_LOCALIZATION_TO_SYNAPSE       | 16  | 0.58 | 1.61 | 0.01 | 0.04 |
|                                                         |     | 9178 | 4233 | 3554 | 6392 |
| GO_ESTABLISHMENT_OF_TISSUE_POLARITY                     | 118 | 0.40 | 1.61 | 0    | 0.04 |
|                                                         |     | 4751 | 3949 |      | 6444 |
| GO_REGULATION_OF GRANULOCYTE DIFFERENTIATION            | 15  | 0.59 | 1.61 | 0.02 | 0.04 |
|                                                         |     | 6164 | 3565 | 3438 | 6538 |
| GO_T_HELPER_17_TYPE_IMMUNE_RESPONSE                     | 29  | 0.51 | 1.61 | 0.00 | 0.04 |
|                                                         |     | 307  | 2103 | 6983 | 7119 |
| GO_REGULATION_OF_RECEPTOR_SIGNALING_PATHWAY_VIA_STAT    | 124 | 0.40 | 1.61 | 0.00 | 0.04 |
|                                                         |     | 3096 | 0973 | 2301 | 7569 |
| GO_POSITIVE_REGULATION_OF_OXIDOREDUCTASE_ACTIVITY       | 51  | 0.45 | 1.60 | 0.01 | 0.04 |
|                                                         |     | 6444 | 9698 | 2723 | 8116 |
| GO_OSTEOCLAST_DEVELOPMENT                               | 16  | 0.59 | 1.60 | 0.01 | 0.04 |
|                                                         |     | 0299 | 9647 | 7241 | 8039 |
| GO_REGULATION_OF_PROTEIN_LOCALIZATION_TO_CELL_PERIPHERY | 106 | 0.41 | 1.60 | 0.00 | 0.04 |
|                                                         |     | 0238 | 711  | 4577 | 9188 |



|                                                                       |     |                  |                  |              |              |
|-----------------------------------------------------------------------|-----|------------------|------------------|--------------|--------------|
| GO_POSITIVE_REGULATION_OF_CELL_MATRIX_ADHESION                        | 53  | 0.44<br>5713     | 1.60<br>6196     | 0.00<br>6361 | 0.04<br>9574 |
| GO_NEGATIVE_REGULATION_OF_PROTEIN_KINASE_B_SIGNALING                  | 37  | 0.48<br>6623     | 1.60<br>5935     | 0.01<br>0695 | 0.04<br>9602 |
| GO_POSITIVE_REGULATION_OF_HUMORAL_IMMUNE_RESPONSE                     | 16  | 0.58<br>4994     | 1.60<br>5005     | 0.02<br>4768 | 0.04<br>9962 |
| GO_PATTERN_RECOGNITION_RECEPTOR_SIGNALING_PATHWAY                     | 163 | 0.38<br>5797     | 1.60<br>4903     | 0.00<br>1101 | 0.04<br>9915 |
| GO_POSITIVE_REGULATION_OF_ACTIVATED_T_CELL_PROLIFERATION              | 23  | 0.53<br>9412     | 1.60<br>4615     | 0.01<br>4306 | 0.04<br>9963 |
| GO_NEGATIVE_REGULATION_OF_ACTIN_FILAMENT_POLYMERIZATION               | 50  | 0.45<br>4303     | 1.60<br>4327     | 0.00<br>7742 | 0.04<br>9987 |
| GO_COTRANSLATIONAL_PROTEIN_TARGETING_TO_MEMBRANE                      | 88  | -<br>0.59<br>986 | -<br>2.84<br>76  | 0            | 0            |
| GO_ESTABLISHMENT_OF_PROTEIN_LOCALIZATION_TO_ENDOPLASMIC_RETICULUM     | 101 | -<br>0.53<br>119 | -<br>2.57<br>588 | 0            | 0            |
| GO_PROTEIN_LOCALIZATION_TO_ENDOPLASMIC_RETICULUM                      | 124 | -<br>0.48<br>205 | -<br>2.46<br>061 | 0            | 0            |
| GO_REPLACEMENT_OSSIFICATION                                           | 26  | -<br>0.66<br>779 | -<br>2.40<br>219 | 0            | 2.41<br>E-04 |
| GO_TRANSLATIONAL_INITIATION                                           | 152 | -<br>0.44<br>169 | -<br>2.30<br>945 | 0            | 0.00<br>1961 |
| GO_DETOXIFICATION_OF_INORGANIC_COMPOUND                               | 15  | -<br>0.71<br>434 | -<br>2.18<br>396 | 0            | 0.00<br>8813 |
| GO_NUCLEAR_TRANSCRIBED_MRNA_CATABOLIC_PROCESS_NONSENSE_MEDIATED_DECAY | 104 | -<br>0.44<br>013 | -<br>2.13<br>123 | 0            | 0.01<br>6007 |
| GO_REGULATION_OF_CHOLESTEROL_METABOLIC_PROCESS                        | 55  | -<br>0.46<br>674 | -<br>2.08<br>141 | 0            | 0.02<br>4006 |
| GO_SENSORY_PERCEPTION_OF_SMELL                                        | 130 | -<br>0.40<br>591 | -<br>2.07<br>276 | 0            | 0.02<br>2832 |
| GO_ENDOCHONDRAL_BONE_MORPHOGENESIS                                    | 49  | -<br>0.48<br>995 | -<br>2.05<br>885 | 0            | 0.02<br>4115 |
| GO_CYTOPLASMIC_TRANSLATION                                            | 68  | -<br>0.45        | -<br>2.05        | 0            | 0.02<br>2616 |

|  |  |    |     |  |  |
|--|--|----|-----|--|--|
|  |  | 07 | 482 |  |  |
|--|--|----|-----|--|--|
