# Supplementary material for: Construction and Validation of a Macrophage-Associated Risk Model for Predicting the Prognosis of Osteosarcoma
Source: J Oncol. 2021 Jun 2;2021:9967954. doi: 10.1155/2021/9967954 (PMC8192206; doi:10.1155/2021/9967954)
Supplement: Supplementary Materials — Table S1. Full list of 384 macrophage-associated genes. Table S2. Enrichment analysis in TARGET-OS. [file 9967954.f1.zip]

Archive with 2 entries (2 files):
- 9967954.f1/Table S2.pdf
- 9967954.f1/TableS1.pdf
